# Supplementary material
Source: PubMed Central journal article supplement (PMC8941448)
Supplement: jama-e222910-s002.pdf [file jama-e222910-s002.pdf]

## Supplemental Online Content

REMAP-CAP Writing Committee; REMAP-CAP Investigators. Effect of antiplatelet therapy on survival and organ support–free days in critically ill patients with COVID-19: a randomized clinical trial. *JAMA*. Published online March 22, 2022. doi:10.1001/jama.2022.2910

### List of REMAP-CAP Investigators

#### eAppendix 1. Supplementary Methods

**eTable 1.** Categories of Anticoagulation Intensity According to Anticoagulant and Dose

#### eAppendix 2. Supplementary Results

**eTable 2.** Participant Characteristics at Baseline

**eTable 3.** Primary and Secondary Analyses of Non-Critically Ill Patients

**eTable 4.** Serious Adverse Events, Major Bleeding, and Thrombotic Events in Non-Critically Ill Patients

**eTable 5.** Other Secondary Outcomes for Critically Ill Patients

**eTable 6.** Serious Adverse Events, Major Bleeding, and Thrombotic Events in Critically Ill Patients

**eTable 7.** Organ Support Free Days (OSFD) Within 21 Days by Age, Mechanical Ventilation Status and Baseline Anticoagulation Dose in Critically Ill Patients

**eTable 8.** Treatment Effects on Organ Support-Free Days and Hospital Survival Among Critically Ill Patients Enrolled in the Antiplatelet Domain and/or Therapeutic Anticoagulation Domain

**eTable 9.** In-Hospital Survival and Organ Support by Differential Anticoagulant Dose Given (Randomized and Clinical Decision) in Critically Ill Patients

**eFigure 1.** Patient Enrolment by Intervention and Time-Period

**eFigure 2.** Distributions of OSFD Odds Ratio for Pooled Antiplatelet

**eFigure 3.** Interaction Between Antiplatelet Allocation and Anticoagulation Dose for OSFD

#### eReferences

This supplemental material has been provided by the authors to give readers additional information about their work.

## List of REMAP-CAP Investigators

### **REMAP-CAP Trial Investigators & Collaborators**

#### *International Trial Steering Committee:*

Farah Al-Beidh, Derek Angus, Djillali Annane, Yaseen Arabi, Abigail Beane, Wilma van Bentum-Puijk, Scott Berry, Zahra Bhimani, Marc Bonten, Charlotte Bradbury, Frank Brunkhorst, Meredith Buxton, Allen Cheng, Matthew Cove, Lennie Derde (Chair), Lise Estcourt, Herman Goossens, Anthony Gordon, Cameron Green, Rashan Haniffa, David Huang, Nao Ichihara, Francois Lamontagne, Patrick Lawler, John Marshall, Colin McArthur, Daniel McAuley, Shay McGuinness, Bryan McVerry, Stephanie Montgomery, Paul Mouncey, Srinivas Murthy, Alistair Nichol, Rachael Parke, Jane Parker, Kathryn Rowan, Hiroki Saito, Marlene Santos, Christopher Seymour, Manu Shankar-Hari, Alexis Turgeon, Anne Turner, Frank van de Veerdonk, Steve Webb, Ryan Zarychanski

#### *Regional Management Committees*

##### ***Australia and New Zealand***

Yaseen Arabi, Aidan Burrell, Lewis Campbell, Allen Cheng, Lennie Derde, Andrew Forbes, David Gattas, Cameron Green, Stephane Heritier, Thomas Hills, Peter Kruger, Colin McArthur (Deputy Executive Director), Shay McGuinness (Chair), Zoe McQuilten, Alistair Nichol, Rachael Parke, Jane Parker, Sandra Peake, Jeffrey Presneill, Manoj Saxena, Ian Seppelt, Vanessa Singh, Tony Trapani, Anne Turner, Steve Webb (Executive Director), Paul Young

##### ***Canadian Regional Management Committee***

Zahra Bhimani, Brian Cuthbertson, Rob Fowler, Francois Lamontagne, John Marshall (Executive Director), Venika Manoharan, Srinivas Murthy (Deputy Executive Director), Marlene Santos, Alexis Turgeon, Ryan Zarychanski

##### ***Critical Care Asia (CCA) Regional Management Committee***

Diptesh Aryal, Abigail Beane (Chair), Arjen M Dondrop, Cameron Green, Rashan Haniffa (Executive Director), Madiha Hashmi, Deva Jayakumar, John Marshall, Colin McArthur, Srinivas Murthy, Sumayyah Rashan, Timo Tolppa, Vanessa Singh, Steve Webb

##### ***European Regional Management Committee***

Farah Al-Beidh, Derek Angus, Djillali Annane, Wilma van Bentum-Puijk, Scott Berry, Marc Bonten (Co-Executive Director), Frank Brunkhorst, Maurizio Cecconi, Lennie Derde (Co-Executive Director and Chair),

Stephan Ehrmann, Bruno Francois, Herman Goossens, Anthony Gordon, Cameron Green, Sebastiaan Hullegie, Colin McArthur, Paul Mouncey, Alistair Nichol, Mathias Pletz, Pedro Pova, Gernot Rohde, Kathryn Rowan, Lorraine Parker, Irma Scheepstra-Beukers, Steve Webb

#### ***United States Regional Management Committee***

Brian Alexander, Derek Angus (Executive Director), Kim Basile, Meredith Buxton (Chair), Timothy Girard, Christopher Horvat, David Huang, Kelsey Linstrum, Florian Mayr, Bryan McVerry, Stephanie Montgomery, Christopher Seymour, Renee Wunderley, Tracey Roberts

#### ***Regional Coordinating Centers***

***Australia, CCA region, and Saudi Arabia:*** The Australia and New Zealand Intensive Care Research Centre (ANZIC-RC), Monash University

***Canada:*** St. Michael's Hospital, Unity Health Toronto

***Europe:*** University Medical Center Utrecht (UMCU)

***New Zealand:*** The Medical Research Institute of New Zealand (MRINZ)

***United States:*** Global Coalition for Adaptive Research (GCAR), and University of Pittsburgh Medical Center

***CRIT Care Asia (CCA):*** NICS MORU.

#### ***Domain-Specific Working Groups***

##### ***Antibiotic and Macrolide Duration Domain-Specific Working Group***

Richard Beasley, Marc Bonten, Allen Cheng (Chair), Nick Daneman, Lennie Derde, Robert Fowler, David Gattas, Anthony Gordon, Cameron Green, Peter Kruger, Colin McArthur, Steve McGloughlin, Susan Morpeth, Srinivas Murthy, Alistair Nichol, David Paterson, Mathias Pletz, Gernot Rohde, Steve Webb

##### ***Corticosteroid Domain-Specific Working Group***

Derek Angus (Chair), Wilma van Bentum-Puijk, Lennie Derde, Anthony Gordon, Sebastiaan Hullegie, Peter Kruger, Edward Litton, John Marshall, Colin McArthur, Srinivas Murthy, Alistair Nichol, Bala Venkatesh, Steve Webb

##### ***Influenza Antiviral Domain-Specific Working Group***

Derek Angus, Scott Berry, Marc Bonten, Allen Cheng, Lennie Derde, Herman Goossens, Sebastiaan Hullegie, Menno de Jong, John Marshall, Colin McArthur, Srinivas Murthy (Chair), Tim Uyeki, Steve Webb

##### ***COVID-19 Antiviral Domain-Specific Working Group***

Derek Angus, Yaseen Arabi (Chair), Diptesh Aryal, Kenneth Baillie, Richard Beasley, Scott Berry, Marc Bonten, Frank Brunkhorst, Aidan Burrell, Allen Cheng, Menno de Jong, Lennie Derde, Eamon Duffy, Rob Fowler, Herman Goossens, Anthony Gordon, Cameron Green, Rashan Haniffa, Madhia Hashmi, Thomas Hills, David Huang, Sabin Koirala, Edward Litton, John Marshall, Colin McArthur, Susan Morpeth, Srinivas Murthy, Mihai Netea, Alistair Nichol, Katrina Orr, Rachael Parke, Jane Parker, Asad Patanwala, Kathryn Rowan, Steve Tong, Tim Uyeki, Frank van de Veerdonk, Steve Webb

***COVID-19 Immune Modulation Domain-Specific Working Group***

Derek Angus, Yaseen Arabi, Kenneth Baillie, Richard Beasley, Scott Berry, Marc Bonten, Frank Brunkhorst, Allen Cheng, Nichola Cooper, Olaf Cremer, Menno de Jong, Lennie Derde (Chair), Eamon Duffy, James Galea, Herman Goossens, Anthony Gordon, Cameron Green, Thomas Hills, Andrew King, Helen Leavis, John Marshall, Florian Mayr, Colin McArthur, Bryan McVerry, Susan Morpeth, Srinivas Murthy, Mihai Netea, Alistair Nichol, Kayode Ogungbenro, Katrina Orr, Jane Parker, Asad Patawala, Ville Pettilä (Deputy Chair), Emma Rademaker, Kathryn Rowan, Manoj Saxena, Christopher Seymour, Wendy Sligl, Steven Tong, Tim Uyeki, Frank van de Veerdonk, Steve Webb, Taryn Youngstein

***COVID-19 Immune Modulation -2 Domain-Specific Working Group***

Derek Angus, Scott Berry, Lennie Derde, Cameron Green, David Huang, Nao Ichihara, Florian Mayr, Colin McArthur, Bryan McVerry, Stephanie Montgomery, Hiroki Saito, Christopher W. Seymour (Chair), Steve Webb

***Therapeutic Anticoagulation Domain-Specific Working Group***

Derek Angus, Diptesh Aryal, Scott Berry, Shailesh Bihari, Charlotte Bradbury, Marc Carrier, Dean Fergusson, Robert Fowler, Ewan Goligher (Deputy Chair), Anthony Gordon, Christopher Horvat, David Huang, Beverley Hunt, Devachandran Jayakumar, Anand Kumar, Mike Laffan, Patrick Lawler, Sylvain Lothar, John Marshall, Colin McArthur, Zoe McQuilten, Bryan McVerry, Saskia Middeldorp, Matthew Neal, Alistair Nichol, Asad Patanwala, Roger Schutgens, Christopher Seymour, Simon Stanworth, Alexis Turgeon, Steve Webb, Ryan Zarychanski (Chair)

***Vitamin C Domain-Specific Working Group***

Neill Adhikari (Chair), Derek Angus, Djillali Annane, Matthew Anstey, Yaseen Arabi, Scott Berry, Emily Brant, Angelique de Man, Lennie Derde, Anthony Gordon, Cameron Green, David Huang, Francois Lamontagne (Chair), Edward Litton, John Marshall, Marie-Helene Masse, Colin McArthur, Shay McGuinness, Paul Mouncey, Srinivas Murthy, Rachael Parke, Alistair Nichol, Tony Trapani, Andrew Udy, Steve Webb

***COVID-19 Immunoglobulin Domain-Specific Working Group***

Jacinta Abraham, Derek Angus, Donald Arnold, Phillipe Begin, Scott Berry, Richard Charlewood, Michael Chasse, Jamie Cooper, Mark Coyne, James Daly, Lise Estcourt (Chair, UK lead), Dean Fergusson, Anthony Gordon, Iain Gosbell, Heli Harvala-Simmonds, Tom Hills (New Zealand lead), Christopher Horvat, David Huang, Sheila MacLennan, John Marshall, John McDyer, Colin McArthur (New Zealand lead), Zoe McQuilten (Australian lead), Bryan McVerry (USA lead), David Menon, Susan Morpeth, Paul Mouncey, Srinivas Murthy, Alistair Nichol (Ireland lead), Nicole Pridee, David Roberts, Kathryn Rowan, Christopher Seymour, Manu Shankar-Hari (UK lead), Helen Thomas, Alan Tinmouth, Darrell Triulzi, Alexis Turgeon (Canada lead), Tim Walsh, Steve Webb, Erica Wood, Ryan Zarychanski (Canada lead)

#### ***Simvastatin Domain-Specific Working Group***

Derek Angus, Yaseen Arabi, Abigail Beane, Carolyn Calfee, Anthony Gordon, Cameron Green, Rashan Haniffa, Deva Jayakumar, Peter Kruger, Patrick Lawler, Edward Litton, Colin McArthur, Daniel McAuley (Chair), Bryan McVerry, Matthew Neal, Alistair Nichol, Cecilia O’Kane, Murali Shyamsundar, Pratik Sinha, Taylor Thompson, Steve Webb, Ian Young

#### ***Antiplatelet Domain-Specific Working Group***

Derek Angus, Scott Berry, Shailesh Bihari, Charlotte Bradbury (Chair), Marc Carrier, Timothy Girard, Ewan Goligher, Anthony Gordon, Ghady Haidar, Christopher Horvat, David Huang, Beverley Hunt, Anand Kumar, Patrick Lawler, John Marshall, Colin McArthur, Zoe McQuilten, Bryan McVerry, Matthew Neal, Alistair Nichol, Christopher Seymour, Simon Stanworth, Steve Webb, Alexandra Weissman, Ryan Zarychanski

#### ***Mechanical Ventilation Domain***

Derek Angus, Wilma van Bentum-Puijk, Aidan Burrell, Lewis Campbell, Lennie Derde, Niall Ferguson, Timothy Girard, Ewan Goligher, Anthony Gordon, Cameron Green, Carol Hodgson, Peter Kruger, John Laffey, Edward Litton, John Marshall, Colin McArthur, Daniel McAuley, Shay McGuinness, Ary Neto, Alistair Nichol (Chair), Neil Orford, Jason Phua, Kathryn Rowan, Ian Seppelt, Steve Webb

#### ***ACE-2 RAAS Domain***

Rebecca Baron, Lennie Derde, Slava Epelman, Claudia Frankfurter, David Gattas, Frank Gommans, Anthony Gordon, Rashan Haniffa, David Huang, Edy Kim, Francois Lamontagne, Patrick Lawler (Chair), David Leaf, John Marshall, Colin McArthur, Daniel McAuley, Bryan McVerry, Muthiah Vaduganathan, Roland van Kimmenade, Frank van de Veerdonk, Steve Webb

#### ***Statistical Analysis Committee***

Michelle Detry, Mark Fitzgerald, Roger Lewis (Chair), Anna McGlothlin, Christina Saunders

### *Statistical Design Team*

Lindsay Berry, Scott Berry, Elizabeth Lorenzi

### *Data Coordinating Team*

Adrian Buzgau, Cameron Green, Alisa Higgins

### *Project Management*

**Australia and Saudi Arabia:** Jane Parker, Vanessa Singh, Claire Zammit

**Canada:** Zahra Bhimani, Marlene Santos

**CCA:** Abigail Beane, Rashan Haniffa, Timo Tolppa, Sumayyah Rashan

**Europe:** Nora Azergui, Sara Bari, Mercedes Beltran, Wilma van Bentum-Puijk, Curt Brugman, Erika Groeneveld, Mina Jafarzadeh, Nicole Keijzer-Timmers, Esmee Kester, Maaïke Koelink, Marion Kwakkenbos-Craanen, Clementina Okundaye, Lorraine Parker, Svenja Peters, Sophie Post, Ilse Rietveld, Irma Scheepstra-Beukers, Gerwin Schreuder Albertine Smit

**Germany:** Nicole Brillinger, René Markgraf, Fred Christian Eichinger

**Global:** Cameron Green

**Ireland:** Kate Ainscough, Kathy Brickell, Peter Doran

**New Zealand:** Anne Turner

**United Kingdom:** Farah Al-Beidh, Aisha Anjum, Janis-Best Lane, Elizabeth Fagbodun, Frances Barton, Lorna Miller, Paul Mouncey, Karen Parry-Billings, Sam Peters, Alvin Richards-Belle, Michelle Saull, Stefan Sprinckmoller, Daisy Wiley, Robert Darnell, Carly Au, Lucy Stronach

**United States of America:** Kim Basile, Meredith Buxton, Kelsey Linstrum, Stephanie Montgomery, Tracey Roberts, Renee Wunderley

### *Database Providers*

**Research Online:** Marloes van Beurden, Evelien Effelaar, Joost Schotsman,

**Spinnaker Software:** Craig Boyd, Cain Harland, Audrey Shearer, Jess Wren

**University of Pittsburgh Medical Center:** Giles Clermont, William Garrard, Christopher Horvat, Kyle Kalchthaler, Andrew King, Daniel Ricketts, Salim Malakouti, Oscar Marroquin, Edwin Music, Kevin Quinn

**NICS MORU: on behalf of CCA:** Udara Attanayaka, Abigail Beane, Sri Darshana, Rashan Haniffa, Pramodya Ishani, Sumayyah Rashan, Timo Tolppa, Ishara Udayanga.

### *Clinical Trials Groups*

The REMAP-CAP platform is supported by the Australian and New Zealand Intensive Care Society Clinical Trials Group, the Canadian Critical Care Clinical Trials Group, the Irish Critical Care Clinical Trials Network, the UK Critical Care Research Group and the International Forum of Acute Care Trialists.

REMAP-CAP was supported in the UK by the NIHR Clinical Research Network and we acknowledge the contribution of Kate Gilmour, Karen Pearson, Chris Siewerski, Sally-Anne Hurford, Emma Marsh, Debbie Campbell, Penny Williams, Kim Shirley, Meg Logan, Jane Hanson, Anne Oliver, Mihaela Sutu, Sheenagh Murphy, Latha Aravindan, Joanne Collins, Holly Monaghan, Adam Unsworth, Seonaid Beddows, Laura Ann Dawson, Sarah Dyas, Adeeba Asghar, Kate Donaldson, Tabitha Skinner, Nhlanhla Mguni, Natasha Muzengi, Ji Luo, Joanna O'Reilly, Chris Levett, Alison Potter, David Porter, Teresa Lockett, Jazz Bartholomew, Clare Rook, Hannah Williams, Alistair S Hall, Hilary Campbell, Holly Speight, Sandra Halden, Susan Harrison, Mobeena Naz, Charles Rounds, Kaatje Lomme, Johnathan Sheffield, William Van't Hoff, James D Williamson, Catherine Birch, Morwenna Brend, Emma Chambers, Sarah Crawshaw, Chelsea Drake, Heather Harper, Stephen Lock, Eleanor OKell, Amber Hayes, Susan Walker, Jayne Goodwin, Helen Hodgson, Yvette Ellis, Dawn Williamson, Madeleine Bayne, Shane Jackson, Rahim Byrne, Sonia McKenna, Alison Clinton, NIHR Urgent Public Health Group: <https://www.nihr.ac.uk/documents/urgent-public-health-group-members/24638#Members>

REMAP-CAP was supported in France by the CRICS-TRIGGERSEP network

REMAP-CAP was supported in Ireland by the Irish Critical Care Clinical Trials Network and we acknowledge the contribution of Kate Ainscough, Kathy Brickell and Peter Doran.

REMAP-CAP was supported in the Netherlands by the Research Collaboration Critical Care the Netherlands (RCC-Net).

REMAP-CAP was supported in Canada by the Canadian Institutes of Health Research, St. Michael's Unity Health, and the Canadian Critical Care Trials Group

REMAP-CAP was supported in the United States by the Translational Breast Cancer Research Consortium, the UPMC Learning While Doing Program, and the Global Coalition for Adaptive Research

### *Site Investigators and Research Coordinators*

#### **Australia:**

*The Alfred Hospital:* Andrew Udy, Phoebe McCracken, Meredith Young, Jasmin Board, Emma Martin

*Ballarat Health Services:* Khaled El-Khawas, Angus Richardson, Dianne Hill, Robert J Commons, Hussam Abdelkharim

*Bendigo Hospital:* Cameron Knott, Julie Smith, Catherine Boschert

*Caboolture Hospital:* Julia Affleck, Yogesh Apte, Umesh Subbanna, Roland Bartholdy, Thuy Frakking

*Campbelltown Hospital:* Karuna Keat, Deepak Bhonagiri, Ritesh Sanghavi, Jodie Nema, Megan Ford

*Canberra Hospital:* Harshel G. Parikh, Bronwyn Avard, Mary Nourse

*Concord Repatriation General Hospital:* Winston Cheung, Mark Kol, Helen Wong, Asim Shah, Atul Wagh

*Eastern Health (Box Hill, Maroondah & Angliss Hospitals):* Joanna Simpson, Graeme Duke, Peter Chan, Brittney Carter, Stephanie Hunter

*Flinders Medical Centre:* Shailesh Bihari, Russell D Laver, Tapaswi Shrestha, Xia Jin

*Fiona Stanley Hospital:* Edward Litton, Adrian Regli, Susan Pellicano, Annamaria Palermo, Ege Eroglu

*Footscray Hospital:* Craig French, Samantha Bates, Miriam Towns, Yang Yang, Forbes McGain

*Gold Coast University Hospital:* James McCullough, Mandy Tallott

*John Hunter Hospital:* Nikhil Kumar, Rakshit Panwar, Gail Brinkerhoff, Cassandra Koppen, Federica Cazzola

*Launceston General Hospital:* Matthew Brain, Sarah Mineall

*Lyell McEwin Hospital:* Roy Fischer, Vishwanath Biradar, Natalie Soar

*Logan Hospital:* Hayden White, Kristen Estensen, Lynette Morrison, Joanne Sutton, Melanie Cooper

*Monash Health (Monash Medical Centre, Dandenong Hospital & Casey Hospital):* Yahya Shehabi, Wisam Al-Bassam, Amanda Hulley, Umesh Kadam, Kushaharan Sathianathan

*Nepean Hospital:* Ian Seppelt, Christina Whitehead, Julie Lowrey, Rebecca Gresham, Kristy Masters

*Princess Alexandra Hospital:* Peter Kruger, James Walsham, Mr Jason Meyer, Meg Harward, Ellen Venz

*The Prince Charles Hospital:* Kara Brady, Cassandra Vale, Kiran Shekar, Jayshree Lavana, Dinesh Parmar

*The Queen Elizabeth Hospital:* Sandra Peake, Patricia Williams, Catherine Kurenda

*Rockhampton Hospital:* Helen Miles, Antony Attokaran

*Royal Adelaide Hospital:* Samuel Gluck, Stephanie O'Connor, Marianne Chapman, Kathleen Glasby

*Royal Darwin Hospital:* Lewis Campbell, Kirsty Smyth, Margaret Phillips

*Royal Melbourne Hospital:* Jeffrey Presneill, Deborah Barge, Kathleen Byrne, Alana Driscoll, Louise Fortune

*Royal North Shore Hospital:* Pierre Janin, Elizabeth Yarad, Frances Bass, Naomi Hammond, Anne O'Connor

*Royal Perth Hospital:* Sharon Waterson, Steve Webb, Robert McNamara

*Royal Prince Alfred Hospital:* David Gattas, Heidi Buhr, Jennifer Coles

*Sir Charles Gardiner Hospital:* Sacha Schweikert, Bradley Wibrow, Matthew Anstey, Rashmi Rauniyar

*St George Hospital:* Kush Deshpande, Pam Konecny, Jennene Miller, Adeline Kintono, Raymond Tung

*St. John of God Midland Public and Private Hospitals:* Ed Fysh, Ashlish Dawda, Bhaumik Mevavala

*St. John of God Hospital, Murdoch:* Annamaria Palermo, Adrian Reglirt De Keulenaer

*St. John of God Hospital, Subiaco:* Ed Litton, Janet Ferrier

*St. Vincent's Hospital (NSW):* Priya Nair, Hergen Buscher, Claire Reynolds, Sally Newman



*St. Vincent's Hospital (VIC):* John Santamaria, Leanne Barbazza, Jennifer Homes, Roger Smith

*Sunshine Coast University Hospital:* Peter Garrett, Lauren Murray, Jane Brailsford, Loretta Forbes, Teena Maguire

*Sunshine Hospital:* Craig French, Gerard Fennessy, John Mulder, Rebecca Morgan, Rebecca McEldrew

*The Sutherland Hospital:* Anas Naeem, M, Laura Fagan, Emily Ryan,

*Toowoomba Hospital:* Vasanth Mariappa, Judith Smith

*University Hospital Geelong:* Scott Simpson, Matthew Maiden, Allison Bone, Michelle Horton, Tania Salerno

*Wollongong Hospital:* Martin Sterba, Wenli Geng

**Belgium:**

*Ghent University Hospital:* Pieter Depuydt, Jan De Waele, Liesbet De Bus, Jan Fierens, Stephanie Bracke, Joris Vermassen, Daisy Vermeiren

**Canada:**

*Brantford General Hospital:* Brenda Reeve, William Dechert

*Centre de recherche de l'Institut universitaire de cardiologie et de pneumologie de Québec:* Francois Lellouche, Patricia Lizotte

*Centre Hospitalier de l'Université de Montreal:* Michaël Chassé, François Martin Carrier, Dounia Boumahni, Fatna Benettaib, Ali Ghamraoui

*CHU de Québec – Université Laval:* Alexis Turgeon, David Bellemare, Ève Cloutier, Rana Daher, Olivier Costerousse, Marie-Claude Boulanger, Émilie Couillard-Chénard, François Lauzier Charles Francoeur

*Centre Hospitalier Universitaire de Sherbrooke:* François Lamontagne, Frédérick D'Aragnon Elaine Carbonneau, Julie Leblond

*Grace Hospital:* Gloria Vazquez-Grande, Nicole Marten

*Grand River Hospital (Kitchener):* Theresa Liu, Atif Siddiqui

*Health Sciences Centre, Winnipeg:* Ryan Zarychanski, Gloria Vazquez-Grande, Nicole Marten, Maggie Wilson

*Hôpital du Sacré Coeur de Montréal:* Martin Albert, Karim Serri, Alexandros Cavayas, Mathilde Duplaix, Virginie Williams

*Juravinski Hospital:* Bram Rochweg, Tim Karachi, Simon Oczkowski, John Centofanti, Tina Millen

*McGill University Health Centre:* Kosar Khwaja, Josie Campisi

*Niagara Health (St. Catherine's Hospital):* Erick Duan, Jennifer Tsang, Lisa Patterson

*Regina General Hospital:* Eric Sy, Jonathan Mailman, Stephen Lee, Chiraag Gupta, Sandy SHA Kassir

*Royal Alexandra Hospital:* Demetrios Kutsogiannis, Patricia Thompson

*Sunnybrook Health Sciences Centre:* Rob Fowler, Neill Adhikari, Maneesha Kamra, Nicole Marinoff

*St. Boniface General Hospital:* Ryan Zarychanski, Nicole Marten

*St. Joseph's Healthcare Hamilton:* Deborah Cook, Frances Clarke

*St. Mary's General Hospital (Kitchener):* Rebecca Kruisselbrink, Atif Siddiqui

*St. Michael's Hospital:* John Marshall, Laurent Brochard, Karen Burns, Gyan Sandhu, Imrana Khalid

*The Ottawa Hospital:* Shane English, Irene Watpool, Rebecca Porteous, Sydney Mieзитis, Lauralyn McIntyre

*University Health Network:* Elizabeth Wilcox, Lorenzo del Sorbo, Hesham Abdelhady, Tina Romagnuolo

*University of Alberta:* Wendy Sligl, Nadia Baig, Oleksa Rewa, Sean Bagshaw

*William Osler Health System:* Alexandra Binnie, Elizabeth Powell, Alexandra McMillan, Tracy Luk, Noah Aref

### **Critical Care Asia:**

#### *India*

*Apollo Speciality Hospital - OMR, Chennai:* Devachandran Jayakumar, R Pratheema, Suresh Babu

*Apollo Main Hospital, Chennai:* C Vignesh, Bharath Kumar TV, N Ramakrishnan, Augustian James,  
Evangeline Elvira

*Apollo Speciality: Vanagaram, Vanagaram, Chennai;* R Ebenezer, S Krishnaoorthy, Lakshmi Ranganathan,  
Manisha Ganesan, Madhu Shree;

*Apollo First Med Hospital, Chennai:* Ashwin Kumar Mani, Meghena Mathew,  
Revathi Kandeepan

#### *Nepal*

*Chitwan Medical College:* Basanta Gauli, Sirjana Bastola

*Grande International Hospital:* Sushil Khanal, Sameena Amatya

*HAMS Hospital:* Hem Raj Paneru, Sabin Koirala, Pratibha Paudel

*Nepal Medcity Hospital:* Diptesh Aryal, Kanchan Koirala, Namrata Rai, Subekshya Luitel

*Tribhuvan University Teaching Hospital:* Hem Raj Paneru, Binita Bhattarai

#### *Pakistan*

*Abbasi Shaheed Hospital:* Aneela Kidwai, Sobia Masood

*National Institute of Cardiovascular Diseases Pakistan:* Nawal Salahuddin, Sobia Masood

*South City Hospital Karachi:* Nasir Khoso, Namra Asif, Huda Taqdees

*Ziauddin Hospital Clifton Campus:* Madiha Hashmi, Maryam Ali, Noor Hassan, Ashok Panjwani, Zulfiqar Ali  
Umrani, Mohiuddin Shaikh, Ayesha Siddiqui

*Ziauddin Hospital North Nazimabad Campus:* Quratul Ain, Darakhshan Kanwal

### **Croatia:**

*General Hospital Pozega:* Zdravko Andric, Sabina Cviljevic, Renata Đimoti, Marija Zapalac, Gordan Mirković

*University Hospital of Infectious Diseases “Fran Milhajevid”*: Vladimir Krajinovic, Marko Kutleša, Viktor Kotarski

*University Hospital of Zagreb*: Ana Vujaklija Brajković, Jakša Babel, Helena Sever, Lidija Dragija, Ira Kušan

### **Estonia**

*Tartu University Hospital*: Kadri Tamme, Veronika Reinhard, Anneli Ellervee, Liisi Põldots, Pille Rennit, Nikolai Svitškar

### **Finland:**

*Helsinki University Hospital*: Suvi Vaara, Leena Pettilä, Jonna Heinonen, Ville Pettilä

*Tampere University Hospital*: Anne Kuitunen, Sari Karlsson, Annukka Vahtera, Heikki Kiiski, Sanna Ristimäki

### **France:**

*Ambroise Pare Hospital*: Amine Azaiz, Cyril Charron, Mathieu Godement, Guillaume Geri, Antoine Vieillard-Baron

*Centre Hospitalier de Dieppe*: Pierre Louis Declercq, Marchalot Antoine, Saladin EP Lafosse Cecile Gelinotte Stephanie, Eraldi Jean-Pierre, Bourgerol François, Beuzelin Marion, Rigaud Jean Philippe

*Centre Hospitalier de Melun*: Franck Pourcine, Mehran Monchi

*Centre Hospitalier Simone Veil, Beauvais*: David Luis, Romain Mercier, Anne Sagnier, Nathalie Verrier, Cecile Caplin, Jack Richecoeu, Daniele Comboux

*Centre Hospitalier Sud Essonne*: Shidasp Siami, Christelle Aparicio, Sarah Vautier, Asma Jeblaoui, Delphine Lemaire-Brunel

*Centre Hospitalier Tenon*: Muriel Fartoukh, Laura Courtin, Vincent Labbe, Guillaume Voiriot, Sara Nesrine Salhi

*Centre Hospitalier Victor Dupouy*: Gaetan Plantefevre, Cécile Leparco, Damien Contou

*CH de Mont de Marsan* : Arnaud Sement, Alexandre Gachet, Alexis Hanisch, Abdelmagid Haffiane, Anne-Hélène Boivin, Amelie Barreau, Elodie Guerineau, Séverine Poupblanc;

*CH des pays de Morlaix* : Pierre Yves Egreteau, Montaine Lefevre, Simon Bocher, Guillaume Le Loup, Lenaïg Le Guen, Vanessa Carn, Melanie Bertel;

*CHR d'Orleans*: Grégoire Muller, Mai-Anh Nay, Toufik Kamel, Dalila Benzekri, Sophie Jacquier, Isabelle Runge, Armelle Mathonnet, François Barbier, Anne Bretagnol

*CHRU Tours Hopital Bretonneau*: Emmanuelle Mercier, Delphine Chartier, Charlotte Salmon, Pierre-François Dequin, Denis Garot

*CHU de Limoges (Dupuytren)*: Bruno Francois, Alexandra Gay, Fedou Anne-Laure

*Hôpital Civil, Hôpitaux Universitaires de Strasbourg:* Ferhat Meziani, Hayat Allam, Jessy Cattelan, Raphael Clere-Jehl, Julie Helms, Christine Kummerlen, Hamid Merdji, Alexandra Monnier, Hassene Rahmani, Studer Antoine

*Hôpital de Hautepierre, Hôpitaux Universitaires de Strasbourg:* Francis Schneider, Vincent Castelain, Guillaume Morel, Sylvie L'Hotellier

*Hôpital Simon Veil, Eaubonne:* Evelina Ochin, Christian Vanjak, Patrick Rouge, Lynda Bendjemar

*Hospital Nord Franche-Comté:* Julio Badie, Fernando Daniel Berdaguer, Sylvain Malfroy, Chaouki Mezher, Charlotte Bourgoin, Guy Moneger, Elodie Bouvier

*Lariboisière Hospital:* Bruno Megarbane, Sebastian Voicu, Nicolas Deye, Isabelle Malissin, Laetitia Sutterlin, Aymen Mrad, Adrien Pépin Lehalleur, Giulia Naim, Philippe Nguyen, Jean-Michel Ekhérian, Yvonnick Boué, Georgios Sidéris, Dominique Vodovar, Emmanuelle Guérin, Caroline Grant

*Raymond Poincaré Hospital:* Djillali Annane, Pierre Moine, Nicholas Heming, Virginie Maxime, Isabelle Bossard, Tiphaine Barbarin Nicholier, Bernard Clair, David Orlikowski, Rania Bounab, Lilia Abdeladim

*Vendee Hospital:* Gwenhael Colin, Vanessa Zinzoni, Natacha Maquigneau, Matthieu Henri-Lagarrigue, Caroline Pouplet

**Germany:**

*Carl-Thiem-Klinikum Cottbus gGmbH:* Jens Soukup, Richard Wetzold, Madlen Löbel, Lisa Starke, Patrick Grimm

*Charité - Universitätsmedizin Berlin:* André Finn, Gabriele Kreß, Uwe Hoff, Carl Friedrich Hinrichs, Jens Nee

*Elisabeth Krankenhaus Essen:* Ingo Voigt, Robert Schueler, Elisabeth Blank, Vanessa Hüning, Melanie Steffen, Patricia Goralski

*Jena University Hospital:* Mathias W. Pletz, Stefan Hagel, Juliane Ankert, Steffi Kolanos, Frank Bloos

*Klinikum Dortmund gGmbH:* Daniela Nickoleit-Bitzenberger, Bernhard Schaaf, Werner Meermeier, Katharina Prebeg, Harun Said Azzoui, Martin Hower, Klaus-Gerd Brieger, Corinna Elender, Timo Sabelhaus, Ansgar Riepe, Ceren Akamp, Julius Kremling, Daniela Klein, Elke Landsiedel-Mechenbier;

*University Hospital of Leipzig:* Sirak Petros, Kevin Kunz, Bianka Schütze

*Universitätsklinikum Hamburg-Eppendorf:* Stefan Kluge, Axel Nierhaus, Dominik Jarczak, Kevin Roedl

*Universitätsklinikum Köln:* Matthias Kochanek, Giusi Rueß-Paterno, Josette Mc-Kenzie, Dennis Eichenauer, Alexander Shimabukuro-Vornhagen;

*University Hospital of Frankfurt:* Gernot Gerhard Ulrich Rohde, Achim Grünewaldt, Jörg Bojunga

*University Hospital of Würzburg:* Dirk Weismann, Anna Frey, Maria Drayss, M.E. Goebeler, Thomas Flor, Gertrud Fragner, Nadine Wahl, Juliane Totzke, Cyrus Sayehli

*Vivantes Klinikum Neukölln:* Lorenz Reill, Michael Distler, Astrid Maselli

**Hungary:**

*Almási Balogh Pál Hospital, Ózd:* János Bélteczki, István Magyar, Ágnes Fazekas, Sándor Kovács, Viktória Szőke;

*Jósa András County Hospital, Nyíregyháza:* Gábor Szigligeti, János Leszkoven;

**Ireland:**

*Beacon Hospital Dublin:* Daniel Collins, Kathy Brickell, Liadain Reid, Michelle Smyth, Patrick Breen, Sandra Spain

*Beaumont Hospital:* Gerard Curley, Natalie McEvoy, Pierce Geoghegan, Jennifer Clarke

*Galway University Hospitals:* John Laffey, Bairbre McNicholas, Michael Scully, Siobhan Casey, Maeve Kernan, Aoife Brennan, Ritika Rangan, Riona Tully, Sarah Corbett, Aine McCarthy, Oscar Duffy, David Burke

*St Vincent's University Hospital, Dublin:* Alistair Nichol, Kathy Brickell, Michelle Smyth, Leanne Hayes, Liadain Reid, Lorna Murphy, Andy Neill, Bryan Reidy, Michael O'Dwyer, Donal Ryan, Kate Ainscough

**Italy:**

*Humanitas Research Hospital:* Romina Aceto, Alessio Aghemo, [Salvatore Badalamenti](#), [Enrico Brunetta](#), Maurizio Cecconi, [Michele Ciccarelli](#), Elena Constantini, Massimiliano Greco, Marco Folci, [Carlo Selmi](#), [Antonio Voza](#)

**Netherlands:**

*Bernhoven ziekenhuis Uden:* Kitty Slieker, Esther Ewalds, Arnate Sanders, Wendy Wittenberg, Heidi Peters Geurts

*Canisius Wilhelmina Ziekenhuis:* Oscar Hoiting, Marco Peters, Els Rengers, Mirjam Evers, Anton Prinssen

*Deventer Hospital:* Huub L.A. van den Oever, Arriette Kruisdijk-Gerritsen

*Hagaziekenhuis Den Haag:* Kees van Nieuwkoop, Thomas Ottens, Yorik Visser, Lettie van den Berg, Annemarie van der Kraan-Donker

*Jeroen Bosch Ziekenhuis:* Koen Simons, Tamara van Zuylen, Angela Bouman

*MCL Leeuwarden:* Marit van Vonderen, Mario Pietersma, Loes Vrolijk, Linda Kampschreur

*Meander Medisch Centrum:* Laura van Gulik

*OLVG Amsterdam:* Nicole Juffermans, Matty Koopmans, Romein Dujardin, Bashar Alderink

*Radboud University Medical Center Nijmegen:* Jeroen Schouten, Peter Pickkers, Noortje Roovers, Margreet Klop-Riehl, Hetty van der Eng, Frank van de Veerdonk, Sonja Sloots-Cuppen, Lieke Preijers, Nienke van Oosten

*Rijnstate ziekenhuis Arnhem:* Robert Jan Hassing, Frances Greven, Danique Huijbens, Harald Verheij, L. Roebbers

*UMC Leiden:* Evert de Jonge, Jeanette Wigbers, Michael del Prado

*UMC Utrecht:* Marc Bonten, Olaf Cremer, Lennie Derde, Jelle Haitsma Mulier, Anna Linda Peters, Birgit Romberg, Helen Leavis, Roger Schutgens, Darren Troeman, Marjolein van Opdorp, Henny Ophorst-den Besten, Karen Brakké

*Ziekenhuis Gelderse Vallei Ede:* Sjoerd van Bree, Marianne Bouw-Ruiter, Margreet Osinga, Arthur van Zanten

***New Zealand:***

*Auckland City Hospital, Cardiothoracic and Vascular ICU:* Shay McGuinness, Rachael Parke, Eileen Guilder, Magdalena Butler, Keri-Anne Cowdrey, Melissa Robertson, Farisha Ali, Ellie McMahon

*Auckland City Hospital, DCCM:* Colin McArthur, Thomas Hills, Eamon Duffy, Yan Chen, Catherine Simmonds, Rachael McConnochie, Caroline O'Connor

*Christchurch Hospital:* Jay Ritzema Carter, Kymbalee Van Der Heyden, Jan Mehrstens, Anna Morris, Stacey Morgan, Tara Burke

*Middlemore Hospital:* Tony Williams, Susan Morpeth, Rima Song, Vivian Lai, Hannah Habraken

*North Shore Hospital:* Robert Everitt, Danielle Hacking

*Rotorua Hospital:* Ulrike Buehner, Erin Williams

*Tauranga Hospital:* Troy Browne, Kate Grimwade, Jennifer Goodson, Owen Keet, Owen Callender

*Waikato Hospital:* Robert Martynoga, Kara Trask, Amelia Butler

*Wellington Regional Hospital:* Paul Young, Chelsea Young, Eden Lesona, Leanlove Navarra, Raulle Sol Cruz, Kirsha Delaney, Rhoze Sol Cruz, April Aguilar-Dano

*Whangarei Hospital:* Ralph Fuchs, Bridget Lambert

*Taranaki Base Hospital:* Jonathan Albrett, Carolyn Jackson, Simon Kirkham

***Portugal:***

*Hospital de Abrantes:* Nuno José Teodoro Amaro dos Santos Catorze, Tiago Nuno Alfaro Lima Pereira, Ricardo Manuel Castro Ferreira, Joana Margarida Pereira Sousa Bastos, Teresa Margarida Oliveira Batista

***Romania:***

*"Dr. Victor Babes" Clinical Hospital of Infectious and Tropical Diseases Bucharest:* Simin Aysel Florescu, Delia Stanciu, Mihaela Florentina Zaharia, Alma Gabriela Kosa, Daniel Codreanu

***Saudi Arabia:***

*King Abdulaziz Medical City- Riyadh:* Yaseen M Arabi, Eman Al Qasim, Lolowa Alswaidan, Mohamed M Hegazy, Hatim Arishi, Ali Al Amri, Samah Y AlQahtani, Brintha Naidu, Haytham Tlayjeh, Sajid Hussain, Farhan [Al Enezi](#), Sheryl Ann Abdukahil .

***Spain:***

*Hospital del Mar:* Rosana Muñoz-Bermúdez, Judith Marin-Corral, Anna Salazar Degracia, Francisco Parrilla Gómez, Maria Isabel Mateo López

*Reina Sofía University Hospital:* Rafael León López, Jorge Rodríguez-Gómez, Sheila Cárcel, Rosario Carmona, Carmen de la Fuente, Marina Rodriguez

**United Kingdom:**

*Aberdeen Royal Infirmary:* Callum Kaye, Amanda Coutts, Lynn MacKay;

*Addenbrooke's Hospital:* Charlotte Summers, Petra Polgarova, Neda Farahi, Eleonore Fox;

*Alder Hey Children's NHS Foundation Trust:* Stephen J McWilliam, Daniel B Hawcutt, Laura Rad, Laura O'Malley, Jennifer Whitbread, Dawn Jones, Rachael Dore, Paula Saunderson;

*Alexandra Hospital Redditch:* Olivia Kelsall, Nicholas Cowley, Laura Wild, Jessica Thrush, Hannah Wood, Karen Austin;

*Altnagelvin Hospital:* Adrian Donnelly, Martin Kelly, Naoise Smyth, Sinéad O'Kane, Declan McClintock, Majella Warnock, Ryan Campbell, Edmund McCallion;

*Antrim Area Hospital:* Paul Johnson, Shirley McKenna, Joanne Hanley, Andrew Currie, Barbara Allen, Clare McGoldrick, Moyra McMaster;

*Barnet Hospital:* Rajeev Jha, Michael Kalogirou, Christine Ellis, Vinodh Krishnamurthy, Aibhilin O'Connor, Saranya Thurairatnam;

*Basildon University Hospital:* Dipak Mukherjee, Agilan Kaliappan, Mark Vertue, Anne Nicholson, Joanne Riches, Gracie Maloney, Lauren Kittridge, Amanda Solesbury, Angelo Ramos;

*Belfast Health and Social Care Trust (Belfast City Hospital, Mater Infirmorium, Royal Victoria Hospital):* Jon Silversides, Peter McGuigan, Kathryn Ward, Aisling O'Neill, Stephanie Finn, Chris Wright, Jackie Green, Érin Collins;

*Brighton and Sussex University Hospitals Trust:* Barbara Phillips, Laura Oritz-Ruiz de Gordoia;

*Calderdale and Huddersfield Foundation Trust:* Jez Pinnell, Matt Robinson, Lisa Gledhill, Tracy Wood;

*Cardiff and Vale University Health Board:* Matt Morgan, Jade Cole, Helen Hill, Michelle Davies, Angharad Williams, Emma Thomas, Rhys Davies, Matt Wise;

*Charing Cross Hospital:* David Antcliffe, Maie Templeton, Roceld Rojo, Phoebe Coghlan, Joanna Smee, Gareth Barker;

*Chesterfield Royal Hospital:* Euan Mackay, Jon Cort, Amanda Whileman, Thomas Spencer, Nick Spittle, Sarah Beavis, Anand Padmakumar, Katie Dale, Joanne Hawes, Emma Moakes, Rachel Gascoyne, Kelly Pritchard, Lesley Stevenson, Justin Cooke, Karolina Nemeth-Roszpopa;

*The Christie NHS Foundation Trust:* Vidya Kasipandian, Amit Patel, Suzanne Allibone, Roman Mary-Genetu;

*Colchester Hospital:* Mohamed Ramali, Ooi HC, Alison Ghosh, Rawlings Osagie, Malka Jayasinghe Arachchige, Melissa Hartley;

*Countess of Chester Hospital:* Peter Bamford, Andrew Reid, Kathryn Cawley, Maria Faulkner, Charlotte Pickering;

*Croydon University Hospital:* Ashok Sundar Raj, Georgios Tsinaslanidis, Reena Nair Khade, Gloria Nwajei Agha, Rose Nalumansi Sekiwala;

*Cumberland Infirmary:* Tim Smith, Chris Brewer, Jane Gregory;

*Darlington Memorial Hospital:* James Limb, Amanda Cowton, Julie O'Brien, Kelly Postlethwaite;

*Derriford Hospital:* Nikitas Nikitas, Colin Wells, Liana Lankester, Helen McMillan;

*Dorset County Hospital:* Mark Pulletz, Patricia Williams, Jenny Birch, Sophie Wiseman, Sarah Horton;

*East Kent Hospitals (Queen Elizabeth the Queen Mother Hospital):* Ana Alegria, Salah Turki, Tarek Elsefi, Nikki Crisp, Louise Allen;

*East Lancashire Hospitals NHS Trust (Royal Blackburn Hospital):* Nicholas Truman, Matthew Smith, Sri Chukkambotla, Wendy Goddard, Stephen Duberley, Meherunnisa Khan, Aayesha Kazi;

*Freeman Hospital and Royal Victoria Infirmary, Newcastle upon Tyne:* Iain J McCullagh, Tom Cairns, Helen Hanson, Bijal Patel, Ian Clement;

*Frimley Health NHS Foundation Trust:* George Evetts, Omar Touma, Susan Holland, Christopher Hodge, Holly Taylor, Meera Alderman, Nicky Barnes, Joana Da Rocha, Catherine Smith, Nicole Brooks, Thanuja Weerasinghe, Julie-Ann Sinclair, Yousuf Abusamra, Ronan Doherty, Joanna Cudlipp, Rajeev Singh, Haili Yu, Admad Daebis, Christopher NG, Sara Kendrick, Anita Saran, Ahmed Makky, Danni Greener, Louise Rowe-Leete, Alexandra Edwards, Yvonne Bland, Rozzie Dolman, Tracy Foster;

*Gateshead Health NHS Trust:* Vanessa Linnett, Amanda Sanderson, Jenny Ritzema, Helen Wild, Rachael Lucas, Yvonne Marriott;

*George Eliot Hospital:* Divya Khare, Meredith Pinder, Amitha Gopinath, Thogulava Kannan, Steven Dean, Piyush Vanmali;

*Glan Clwyd Hospital:* Richard Pugh, Richard Lean, Xinyi Qiu, Jeremy Scanlan, Andrew Evans, Gwyneth Davies, Joanne Lewis;

*Glangwili General Hospital:* Yvonna Plesnikova, Ahmed Ben Khoud, Samantha Coetzee;

*Glasgow Royal Infirmary:* Kathryn Puxty, Susanne Cathcart, Dominic Rimmer, Catherine Bagot, Kathryn Scott, Laila Martin;

*Glenfield Hospital Leicester:* Hakeem Yusuff, Graziella Isgro, Chris Brightling, Michelle Bourne, Michelle Craner, Rebecca Boyles;

*Grange University Hospital:* Tamas Szakmany, Shiney Cherian, Gemma Williams, Christie James, Abby Waters;

*Great Western Hospitals NHS Foundation Trust:* Rachel Prout, Roger Stedman, Louisa Davies, Suzannah Pegler, Lynsey Kyeremeh, Louise Moorhouse;

*Guy's & St Thomas' NHS Foundation Trust:* Manu Shankar-Hari, Gill Arbane, Marina Marotti, Aneta Bociiek, Sara Campos;



*Hammersmith Hospital:* Stephen Brett, Sonia Sousa Arias, Rebecca Elin Hall;

*Homerton University Hospital NHS Foundation Trust:* Susan Jain, Abhinav Gupta, Catherine Holbrook, Pierre Antoine;

*James Cook University Hospital:* Jeremy Henning, Stephen Bonner, Keith Hugill, Emanuel Cirstea, Dean Wilkinson, Jessica Jones, Mohammed Nagy Tawfik Altomy;

*James Paget University Hospitals:* Michal Karlikowski, Helen Sutherland, Elva Wilhelmsen, Jane Woods, Julie North;

*Kettering General Hospital:* Dhinesh Sundaran, Laszlo Hollos, Anna Williams, Margaret Turns, Joanne Walsh;

*King's College Hospital (Denmark Hill site):* Phil Hopkins, John Smith, Harriet Noble, Kevin O'Reilly, Reena Mehta, Onyee Wong, Esther Makanju, Deepak Rao, Nyma Sikondari, Sian Saha, Ele Corcoran, Evita Pappa, Maeve Cockrell, Clare Donegan, Morteza Balaie;

*Lancashire Teaching Hospitals NHS Foundation Trust:* Shondipon Laha, Mark Verlander, Alexandra Williams, Avinash Kumar Jha;

*Leeds Teaching Hospitals Trust:* Elankumaran Paramasivam, Elizabeth Wilby, Bethan Ogg, Clare Howcroft, Angelique Aspinwall, Sam Charlton, Richard Gould, Deena Mistry, Sidra Awan, Caroline Bedford, Joanne Carr-Wilkinson;

*Leicester General Hospital:* Andrew Hall, Jill Cooke, Caroline Gardiner-Hill, Carolyn Maloney, Nigel Brunskill, Olivia Watchorn, Chloe Hardy;

*Leicester Royal Infirmary:* Hafiz R Qureshi, Neil Flint, Sarah Nicholson, Sara Southin, Andrew Nicholson, Amardeep Ghattaoraya;

*Lewisham and Greenwich NHS Trust:* Dr Daniel Harding, Sinead O'Halloran, Amy Collins, Emma Smith, Estefania Trues;

*Liverpool Foundation Trust Aintree:* Barbara Borgatta, Ian Turner-Bone, Amie Reddy, Laura Wilding;

*Liverpool Heart and Chest Hospital:* Craig Wilson, Zuhra Surti;

*Luton and Dunstable University Hospital:* Loku Chamara Warnapura, Ronan Agno, Prasannakumari Sathianathan, Deborah Shaw, Nazia Ijaz, Adam Spong, Suganya Sabaretnam, Dean Burns, Eva Lang, Margaret Louise Tate;

*Maidstone and Tunbridge Wells NHS Trust:* David Golden, Miriam Davey, Rebecca Seaman, Alexander Osborne;

*Manchester Royal Infirmary:* Jonathan Bannard-Smith, Richard Clark, Kathrine Birchall, Joanne Henry, Fiona Pomeroy, Rachael Quayle, Katharine Wylie, Anila Sukuraman, Maya John, Sindhu Sabin;

*Medway Maritime Hospital:* Arystarch Makowski, Beata Misztal, Syeda Haider, Angela Liao, Rebecca Squires;

*Milton Keynes University Hospital:* Richard Stewart, Esther Mwaura, Louise Mew, Lynn Wren, Felicity Williams, Sara-Beth Sutherland, Rashmi Rebello;

*Mid & South Essex NHS Foundation Trust:* Aneta Oborska, Abdul Kayani, Selver Kalchko-Veyssal, Rajalakshmi Orath Prabakaran, Bernard Hadebe, Selver KalchkoVeyssal;

*Musgrove Park Hospital:* Richard Innes, Patricia Doble, Libby Graham, Charmaine Shovelton, Tessa Dean;  
*Nevill Hall Hospital:* Vincent Hamlyn, Nancy Hawkins, Anna Roynon-Reed, Sean Cutler, Sarah Lewis;  
*Newham University Hospital:* Juan Martin Lazaro, Tabitha Newman;  
*Ninewells Hospital:* Pauline Austin, Susan Chapman, Louise Cabrelli;  
*Norfolk and Norwich University Hospital:* Simon Fletcher, Jurgens Nortje, Deirdre Fottrell-Gould, Georgina  
Randell, Katie Stammers, Gail Healey, Marta Goncalves Pinto;  
*Northampton General Hospital:* Mohsin Zaman, Einas Elmahi, Andrea Jones, Kathryn Hall;  
*Northern General Hospital, Sheffield:* Gary H Mills, Ajay Raithatha, Kris Bauchmuller, Kim Ryalls, Kate  
Harrington, Helen Bowler, Jas Sall, Richard Bourne;  
*Northwick Park Hospital NHS Trust:* Jamie Gross, Natalie Massey, Olumide Adebambo, Matilda Long, Kiran  
Tony;  
*North Manchester General Hospital:* Zoe Borrill, Tracy Duncan, Andrew Ustianowski, Alison Uriel, Ayaa  
Eltayeb, Jordan Alfonso, Samuel Hey, Joanne Shaw, Claire Fox, Gabriella Lindergard, Bethan Charles,  
Bethany Blackledge, Karen Connolly, Jade Harris;  
*North Middlesex University Hospital:* Jeronimo Moreno Cuesta, Kugan Xavier, Dharam Purohit, Munzir  
Elhassan, Anne Haldeos, Rachel Vincent, Marwa Abdelrazik, Samuel Jenkins, Arunkumar Ganesan,  
Rohit Kumar, David Carter, Dhanalakshmi Bakthavatsalam, Alasdair Frater, Malik Tahir Saleem;  
*Oxford University Hospitals:* Matthew Rowland, Paula Hutton, Archana Bashyal, Neil Davidson, Clare Hird;  
*Pilgrim Hospital Boston:* Manish Chhablani, Gunjan Phalod, Amy Kirkby, Simon Archer, Kimberley Netherton;  
*Princess Royal Hospital:* Denise Skinner, Jane Gaylard, Julie Newman;  
*Princess of Wales Hospital:* Sonia Sathe, Lisa Roche, Ellie Davies;  
*Poole Hospital:* Henrik Reschreiter, Julie Camsooksai, Sarah Patch, Sarah Jenkins, Charlotte Humphrey;  
*Queen Alexandra Hospital Portsmouth:* David Pogson, Steve Rose, Zoe Daly, Lutece Brimfield, Angie Nown;  
*Queen Elizabeth Hospital, Birmingham:* Dhruv Parekh, Colin Bergin, Michelle Bates, Christopher McGhee,  
Daniella Lynch, Khushpreet Bhandal, Kyriaki Tsakiridou, Amy Bamford, Lauren Cooper, Tony  
Whitehouse, Tonny Veenith, Elliot Forster, Martin O'Connell;  
*Queen Elizabeth University Hospital, Glasgow:* Malcolm A.B. Sim, Sophie Kennedy Hay, Steven Henderson,  
Maria Nygren, Eliza Valentine;  
*Queen's Hospital, Burton:* Amro Katary, Gillian Bell, Louise Wilcox, Michail Mataliotakis, Paul Smith, Murtaza  
Asif Ali, Agah Isguzar;  
*Queen's Hospital, Romford:* Mandeep-Kaur Phull, Abbas Zaidi, Tatiana Pogreban, Lace Paulyn Rosaroso;  
*Queens Medical Centre and Nottingham City Hospital:* Daniel Harvey, Benjamin Lowe, Megan Meredith, Lucy  
Ryan, DREEM Research Team;  
*The Rotherham NHS Foundation Trust:* Anil Hormis, Rachel Walker, Dawn Collier, Sarah Kimpton, Susan  
Oakley;

*Royal Alexandra Hospital:* Kevin Rooney, Natalie Rodden, Nicola Thomson, Deborah McGlynn, Lynn Abel, Lisa Gemmell, Radha Sundaram, James Hornsby;

*Royal Berkshire Hospital:* Andrew Walden, Liza Keating, Matthew Frise, Sabi Gurung Rai, Shauna Bartley;

*Royal Bournemouth and Christchurch Hospitals:* Martin Schuster-Bruce, Sally Pitts, Rebecca Miln, Laura Purandare, Luke Vamplew;

*Royal Brompton Hospital:* Brijesh Patel, Debra Dempster, Mahitha Gummadi, Natalie Dormand, Shu Fang Wang;

*Royal Cornwall NHS Trust:* Michael Spivey, Sarah Bean, Karen Burt, Lorraine Moore, Fiona Hammonds, Carol Richards;

*Royal Devon and Exeter NHS Foundation Trust:* Christopher Day, Letizia Zitter, Sarah Benyon;

*Royal Glamorgan Hospital:* Jayaprakash Singh, Ceri Lynch, Lisa Roche, Justyna Mikusek, Bethan Deacon, Keri Turner;

*Royal Gwent Hospital:* Evelyn Baker, John Hickey, Shreekant Champanerkar, Lindianne Aitken, Lorraine LewisProsser, Christie James;

*Royal Hallamshire Hospital, Sheffield:* Gary H Mills, Norfaizan Ahmad, Matt Wiles, Jayne Willson;

*Royal Hampshire Hospitals:* Irina Grecu, Jane Martin, Caroline Wrey Brown, Ana-Marie Arias, Emily Bevan, Samantha Westlake;

*Royal Infirmary of Edinburgh:* Thomas H Craven, David Hope, Jo Singleton, Sarah Clark, Corrienne McCulloch, Simon Biddie;

*Royal Liverpool University Hospital:* Ingeborg D Welters, David Oliver Hamilton, Karen Williams, Victoria Waugh, David Shaw, Suleman Mulla, Alicia Waite, Jaime Fernandez Roman, Maria Lopez Martinez, Brian Johnston;

*Royal London Hospital:* Zudin Puthuchear, Timothy Martin, Filipa Santos, Ruzena Uddin, Maria Fernandez, Fatima Seidu, Alastair Somerville, Mari-Liis Pakats, Salma Begum, Tasnin Shahid;

*The Royal Free Hospital:* Sanjay Bhagani, Mark De Neef, Sara Mingo Garcia, Amitaa Maharajh, Aarti Nandani, Jade Dobson, Gloria Fernando, Christine Eastgate, Keith Gomez, Zakee Abdi;

*The Royal Marsden NHS Foundation Trust:* Kate Colette Tatham, Shaman Jhanji, Ethel Black, Arnold Dela Rosa, Ryan Howle, Ravishankar Rao Baikady;

*The Royal Oldham Hospital:* Redmond P Tully, Andrew Drummond, Joy Dearden, Jennifer E Philbin, Sheila Munt;

*The Royal Wolverhampton NHS Trust:* Shameer Gopal, Jagtar- Singh Pooni, Saibal Ganguly, Andrew Smallwood, Stella Metherell;

*Royal Papworth Hospital:* Alain Vuylsteke, Charles Chan, Saji Victor, COVID Research Team, Papworth Hospital;

*Royal Stoke Hospital:* Ramprasad Matsa, Minerva Gellamucho, Michelle Davies;

*Royal Surrey County Hospital:* Ben Creagh-Brown, Cheryl Marriot, Armored Salberg, Louisa Zouita, Sarah Stone, Natalia Michalak, Sinead Donlon, Shelia Mtuwa, Irving Mayangao, Jerik Verula, Dorota Burda, Celia Harris, Emily Jones, Paul Bradley, Esther Tarr, Lesley Harden, Charlie Piercy;

*Royal United Hospital Bath:* Jerry Nolan, Ian Kerslake, Tim Cook, Tom Simpson, James Dalton, Carrie Demetriou, Sarah Mitchard, Lidia Ramos, Katie White, Toby Johnson, William Headdon, Stephen Spencer, Alison White, Lucy Howie;

*Russells Hall Hospital:* Michael Reay, Steve Jenkins, Angela Watts, Eleanor Traverse, Stacey Jennings, Vikram Anumakonda, Caroline Tuckwell, Karen Pearson, Kath Harrow, Julie Matthews, Karen McGarry, Vanessa Moore, Lucie Smith, Anna Summerfield;

*Salisbury NHS Foundation Trust:* Phil Donnison, Ruth Casey, Ben Irving, Wadzanai Matimba-Mupaya, Catherine Reed, Alpha Anthony, Fiona Trim, Lenka Cambalova, Debra Robertson, Anna Wilson;

*Salford Royal NHS Foundation Trust:* Paul Dark, Alice Harvey, Reece Doonan, Liam McMorro, Karen Knowles, Jessica Pendlebury, Stephanie Lee, Jane Perez, Bethan Charles, Tracy Marsden, Melanie Taylor, Angiy Michael, Matthew Collis, Andrew Claxton, Wadih Habeichi, Dan Horner, Melanie Slaughter, Vicky Thomas, Nicola Proudfoot, Claire Keatley;

*Sandwell and West Birmingham NHS Trust:* Jonathan Hulme, Santhana Kannan, Fiona Kinney, Ho Jan Senya, Anne Hayes;

*Sherwood Forest Hospitals NHS Foundation Trust:* Valli Ratnam, Mandy Gill, Jill Kirk, Sarah Shelton;

*South Tyneside District Hospital:* Christian Frey, Riccardo Scano, Madeleine McKee, Peter Murphy;

*Southmead Hospital:* Matt Thomas, Ruth Worner, Beverley Faulkner, Emma Gendall, Kati Hayes, Hayley Blakemore, Borislava Borislavova;

*St. Bartholomew's Hospital:* Colin Hamilton-Davies, Carmen Chan, Celina Mfuko, Hakam Abbass, Vineela Mandadapu;

*St. George's Hospital:* Susannah Leaver, Kamal Patel, Sarah Farnell-Ward, Romina Pepermans Saluzzio, Sam Rawlins, Christine Sicut;

*St. Mary's Hospital:* Anthony Gordon; Dorota Banach, Ziortza Fernández de Pinedo Artaraz, Leilani Cabrerros, Victoria Latham;

*St. Peter's Hospital, Chertsey:* Ian White, Maria Croft, Nicky Holland, Rita Pereira;

*Stepping Hill Hospital, Stockport:* Ahmed Zaki, David Johnson, Hywel Garrard, Vera Juhaz, Louise Brown, Abigail Pemberton;

*Sunderland Royal Hospital:* Alistair Roy, Anthony Rostron, Lindsey Woods, Sarah Cornell;

*Swansea Bay University Health Board:* Suresh Pillai, Rachel Harford, Helen Ivatt, Debra Evans, Suzanne Richards, Eilir Roberts, James Bowen, James Ainsworth;

*Torbay and South Devon NHS Foundation Trust:* Angela Foulds, Adam Revill;

*United Lincolnshire NHS Trust:* Russell Barber, Anette Hilldrith, Gunjan Phalod;

*University Hospitals Bristol & Weston NHS Foundation Trust:* Jeremy Bewley, Katie Sweet, Lisa Grimmer, Rebekah Johnson, Rachel Wyatt, Karen Morgan, Siby Varghese, Charlotte Bradbury, Joanna Willis, Emma Stratton, Laura Kyle, Daniel Putensen, Kay Drury, Agnieszka Skorko;

*University Hospitals Coventry & Warwickshire NHS Trust:* Pamela Bremmer, Geraldine Ward, Christopher Bassford;

*University Hospital of North Tees:* Farooq Brohi, Vijay Jagannathan, Michele Clark, Sarah Purvis, Bill Wetherill;

*University Hospital Southampton NHS Foundation Trust:* Ahilanandan Dushianthan, Rebecca Cusack, Kim de Courcy-Golder, Karen Salmon, Rachel Burnish, Simon Smith, Susan Jackson, Winningtom Ruiz, Zoe Duke, Margaret Johns, Michelle Male, Kirsty Gladas, Satwinder Virdee, Jacqueline Swabe, Helen Tomlinson;

*Warwick Hospital:* Ben Attwood, Penny Parsons, Bridget Campbell, Alex Smith;

*Watford General Hospital:* Valerie J Page, Xiao Bei Zhao, Deepali Oza, Gail Abrahamson, Ben Sheath, Chiara Ellis;

*Western General Hospital, Edinburgh:* Jonathan Rhodes, Thomas Anderson, Sheila Morris;

*Whipps Cross Hospital:* Charlotte Xia Le Tai, Amy Thomas, Alexandra Keen, Carey Tierney, Nimca Omer, Gina Bacon;

*Whiston Hospital:* Ascanio Tridente, Karen Shuker, Jeanette Anders, Sandra Greer, Paula Scott, Amy Millington, Philip Buchanan, Jodie Kirk

*Wirral University Teaching Hospital NHSFT:* Craig Denmade, Girendra Sadera, Reni Jacob, Cathy Jones, Debbie Hughes;

*Worcester Royal Hospital:* Stephen Digby, Nicholas Cowley, Laura Wild, Jessica Thrush, Hannah Wood, Karen Austin;

*Wrexham Maelor Betsi Cadwaladr University Hospital:* David Southern, Harsha Reddy, Sarah Hulse, Andrew Campbell, Mark Garton, Claire Watkins, Sara Smuts;

*Wrightington, Wigan and Leigh Teaching Hospitals NHS Foundation Trust:* Alison Quinn, Benjamin Simpson, Catherine McMillan, Cheryl Finch, Claire Hill, Josh Cooper;

*Wye Valley NHS Trust:* Joanna Budd, Charlotte Small, Ryan O'Leary, Janine Birch, Emma Collins, Andrew Holland;

*Wythenshawe Hospital:* Peter D G Alexander, Tim Felton, Susan Ferguson, Katharine Sellers, Luke Ward;

*York Teaching Hospital:* David Yates, Isobel Birkinshaw, Kay Kell, Zoe Scott, Harriet Pearson;

### ***United States of America***

*University of Pittsburgh Research Staff:* CRISMA Center—Kelsey Linstrum, Stephanie Montgomery, Kim Basile, Dara Stavor, Dylan Burbee, Amanda McNamara, Renee Wunderley, Nicole Bensen, Aaron

Richardson; MACRO Center—Peter Adams, Tina Vita, Megan Buhay, Denise Scholl, Matthew Gilliam, James Winters, Kaleigh Doherty, Emily Berryman

*UPMC Hospital Champions:* UPMC Altoona—Mehrddad Ghaffari, UPMC East—Meghan Fitzpatrick; UPMC Jameson and Horizon —Kavitha Bagavathy, Debra Drapola; UPMC Mercy—Mahwish Hussain, Chenell Donadee; UPMC Williamsport—Emily Brant; UPMC McKeesport—Kayla Bryan-Morris, John Arnold and Bob Reynolds; UPMC Hamot—Gregory Beard; UPMC Presbyterian— David Huang, David McAdams, Bryan McVerry, Gena Walker; UPMC Pinnacle—Janice Dunsavage, Salim Saiyed, Erik Hernandez, John Goldman, Cynthia Brown, Susan Comp, James Raczek, Jenny Lynne Morris, Jesus Vargas Jr., Daniel Weiss, Joseph W. Hensley, Erik Kochert, Chris Wnuk, Christopher Nemeth, Brent Mowery, Christina Hutchinson, Lauren Winters

*UPMC Covid-19 Therapeutics Committee:* Erin McCreary, Elise Martin, Ryan Bariola, Alex Viehman, Jessica Daley, Alyssa Lopus, Mark Schmidhofer, UPMC Directors of Pharmacy

*UPMC ICU Service Center:* Rachel Sackrowitz, Chenell Donadee, Aimee Skrtich

*UPMC Wolff Center:* Tami Minnier, Mary Kay Wisniewski, Katelyn Mayak

*UPMC eRecord Team:* Richard Ambrosino, Sherbrina Keen, Sue Della Toffalo, Martha Stambaugh, Ken Trimmer, Reno Perri, Sherry Casali, Rebecca Medva, Brent Massar, Ashley Beyerl, Jason Burkey, Sheryl Keeler, Maryalyce Lowery, Lynne Oncea, Jason Daugherty, Chanthou Sevilla, Amy Woelke, Julie Dice, Lisa Weber, Jason Roth, Cindy Ferringer, Deborah Beer, Jessica Fesz, Lillian Carpio

*Data Collection/Curation Team:* Salim Malakouti (Computer Science, University of Pittsburgh), Edwin Music and Dan Ricketts (CRISMA Center), Andrew King (Biomedical Informatics, University of Pittsburgh), Gilles Clermont (Critical Care Medicine), Robert Bart (UPMC Health Services Division)

*UPMC Clinical Analytics:* Oscar Marroquin, Kevin Quinn, William Garrard, Kyle Kalchthaler

*UPMC Office of Healthcare Innovation:* Derek Angus, Christopher Seymour, Kelsey Linstrom, Stephanie Montgomery

*Department of Emergency Medicine:* Alexandra Weissman, Donald Yealy, David Barton, Nadine Talia

*Department of Critical Care Medicine:* David Huang, Florian Mayr, Andrew Schoenling, Mark Andreae, Varun Shetty, Emily Brant, Brian Malley, Chenell Donadee, Derek Angus, Christopher Horvat, Christopher Seymour, Timothy Girard, Gilles Clermont, Rachel Sackrowitz, Robert Bart

*Division of Infectious Diseases:* Ghady Haidar

*Division of Pulmonary, Allergy, and Critical Care Medicine:* William Bain, Ian Barbash, Meghan Fitzpatrick, Georgios Kitsios, Bryan McVerry, Kaveh Moghbeli, Brian Rosborough, Faraaz Shah, Tomeka Suber

*Global Coalition for Adaptive Research (GCAR):* Meredith Buxton, Brian Alexander, Tracey Roberts, Apoorva Nelli, Rachel Rosenstein-Sisson, Rebecca Speyer, Yadira Pech

*UPMC Laboratory Services:* Alan H. Wells

## eAppendix 1. Supplementary Methods

### 1.1 Additional information about REMAP-CAP general design

REMAP-CAP is an international, multicenter, open-label adaptive platform trial to determine best treatment strategies for patients with severe pneumonia in both pandemic and non-pandemic settings. A full description of the trial design is provided elsewhere<sup>1</sup> and below is a short summary.

The trial uses a novel design entitled a randomized embedded multifactorial adaptive platform (REMAP).<sup>2</sup> The design has five key features: randomization, allowing causal inference; embedding of study procedures into routine clinical care, facilitating enrollment and generalizability; a multifactorial statistical model comparing multiple interventions across multiple patient subgroups; response-adaptive randomization with preferential assignment to those interventions that appear most favorable after regular adaptive analyses, and; a platform structured to permit continuous, potentially perpetual, enrollment.

Once the Covid-19 outbreak began, a new pandemic stratum was added within REMAP-CAP. Specifically, all patients hospitalized with suspected or proven Covid-19 are assigned to the pandemic stratum. They are further classified as being in either moderate (non-critically ill) or severe (critically ill) disease state. Severe disease state is defined by receiving respiratory or cardiovascular organ failure support in an intensive care unit (ICU). Respiratory support is defined as heated high flow oxygen delivery at  $\geq 30$  liters/min and FiO<sub>2</sub> 0.40, non-invasive positive pressure ventilation, or invasive mechanical ventilation. All other hospitalized patients are defined as being in the moderate state.

This report relates to the analysis of the in the Antiplatelet Therapy domain up to June 23, 2021. Other domains open to randomization within the pandemic stratum moderate and severe state up to this date were:

- Corticosteroid domain (open March 9, 2020, closed June 17, 2020)
- Immune Modulation version 1 domain (open April 19, 2020, closed April 10, 2021)
- Immune Modulation version 2 domain (open October 21, 2020)
- Covid-19 Antiviral domain (open March 9, 2020)
- Covid-19 Immunoglobulin domain (open April 29, 2020, and closed January 18, 2021)
- Therapeutic Anticoagulation version 1 domain (open May 6, 2020, and closed January 22, 2021)
- Therapeutic Anticoagulation version 2 (open April 7, 2021)
- Vitamin C domain (open October 16, 2020)
- Simvastatin domain (open October 10, 2020)
- ACE2 Renin Angiotensin System (RAS) domain (open Jan 25, 2021)

- Mechanical Ventilation (open March 28, 2021)

## **1.2 REMAP-CAP Eligibility Criteria for suspected or proven Covid-19**

### *Platform inclusion criteria:*

- Adult patient admitted to hospital with acute illness due to suspected or proven pandemic (Covid-19) infection

### *Platform exclusion criteria:*

- Death is deemed to be imminent and inevitable during the next 24 hours AND one or more of the patient, substitute decision maker or attending physician are not committed to full active treatment
- Patient is expected to be discharged from hospital today or tomorrow
- More than 14 days have elapsed while admitted to hospital with symptoms of an acute illness due to suspected or proven pandemic infection
- Previous participation in this REMAP within the last 90 days

### *Antiplatelet Therapy domain specific inclusion criteria:*

- Covid-19 infection is suspected by the treating clinician or has been confirmed by microbiological testing
- Microbiological testing for SARS-CoV-2 of upper or lower respiratory tract secretions or both has occurred or is intended to occur

### *Antiplatelet Therapy domain specific exclusion criteria:*

- More than 48 hours has elapsed since ICU admission
- Clinical or laboratory bleeding risk or both that is sufficient to contraindicate antiplatelet therapy
- Patient is already receiving antiplatelet therapy or NSAID (non-steroidal anti-inflammatory drug) or a clinical decision has been made to commence antiplatelet or NSAID therapy
- Enrollment in a trial evaluating anticoagulation or antiplatelet therapy for proven or suspected COVID-19 infection, where the protocol of that trial requires continuation of the treatment assignment specified in that trial
- Patients older than 75 years AND otherwise eligible for the Therapeutic Anticoagulation Domain
- Creatinine Clearance <30 ml/min, or receiving renal replacement therapy or ECMO
- The treating clinician believes that participation in the domain would not be in the best interests of the patient



### *Intervention specific exclusion criteria:*

- Known hypersensitivity to an agent specified as an intervention in this domain will exclude a patient from receiving that agent.
- Known or suspected pregnancy will result in exclusion from the P2Y12 inhibitor intervention
- Administration or intention to administer lopinavir/ritonavir will result in exclusion from the P2Y12 inhibitor intervention at sites that are using clopidogrel and ticagrelor as the P2Y12 inhibitor

## **1.3 Outcomes**

### **1.3.1 Secondary outcomes:**

- Survival to hospital discharge (dichotomous)
- 90-day mortality (time to event)
- Progression to invasive mechanical ventilation, extracorporeal membrane oxygenation (ECMO), or death among those not on invasive mechanical ventilation or ECMO at baseline (dichotomous)
- Vasopressor/Inotrope-Free days
- Respiratory Support-Free days
- Duration of ICU stay
- Duration of hospital stay
- At least one serious adverse event
- WHO ordinal scale (range: 0-8, where 0 = no illness, 1-7 = increasing level of care, and 8 = death) assessed at day 14.<sup>3</sup> In this analysis categories 0,1,2 have been condensed into one category for all patients discharge from hospital.
- Major bleeding on or before day 14 as defined according to International Society of Thrombosis and Haemostasis (ISTH) criteria in non-surgical patients (see below for definition)
- Fatal bleeding on or before day 14
- Intracranial hemorrhage on or before day 14
- Deep venous thrombosis
- Pulmonary embolism
- Ischemic cerebrovascular event
- Acute myocardial infarction
- All thrombotic events
- Venous thrombotic event
- Arterial thrombotic event
- All thrombotic event or death
- Venous thrombotic event or death
- Arterial thrombotic event or death

### 1.3.2 Secondary outcome definitions

Major bleeding (according to International Society of Haemostasis and Thrombosis – ISTH - definition)<sup>4</sup>

Fatal bleeding, symptomatic or clinically manifest bleeding in a critical are or organ (such as intracranial, intraspinal, intraocular, retroperitoneal, intraarticular, pericardial, or intramuscular with compartment syndrome),

OR

Bleeding causing a fall in hemoglobin of  $\geq 2\text{g/dL}$ , or leading to the transfusion of 2 or more whole blood or red cell units

#### Acute Myocardial Infarction (AMI)

The definition of an AMI requires detection of rise and fall or just a fall of cardiac biomarkers, such as any form of troponin assay, with at least one value above the upper reference limit (URL) PLUS evidence of myocardial ischemia with at least one of the following:

- Symptoms of cardiac ischemia
- ECG changes indicative of new ischemia (new ST-T changes or new LBBB)\*
- Development of pathological Q waves in the ECG\*\*
- Imaging evidence of new loss of viable myocardium or new regional wall motion abnormality

\*ECG manifestation of acute myocardial ischemia (in the absence of LVH and LBBB):

- ST Elevation - New ST elevation at the J-point in two contiguous leads with the cut-off points of  $\geq 0.2$  mV in men or  $\geq 0.15$  mV in women in leads V2-V3 and/or  $\geq 0.1$  mV in other leads.
- ST depression and T-wave changes – New horizontal or down-sloping ST depression  $\geq 0.05$  mV in two contiguous leads; and/or T inversion  $\geq 0.1$  mV in two contiguous leads with prominent R waves or R/S ratio  $>1$ .

\*\*Pathological Q waves:

- Any Q-wave in leads V2-V3  $\geq 0.02$  seconds or QS complex in leads V2 and V3
- Q-wave  $\geq 0.03$  seconds and  $\geq 0.1$  mV deep or QS complex in leads I, II, aVL, aVF, or V4-V6 an any two leads of a contiguous lead grouping (I, aVL, V6; V4-V6; II, III, aVF; V7-V9).
- R-wave  $\geq 0.04$  s in V1–V2 and R/S  $\geq 1$  with a concordant positive T-wave in the absence of a conduction defect

#### Confirmed deep vein thrombosis

Proximal deep vein thrombosis (DVT) is a thrombus located in axillary vein or more proximal, including the internal jugular vein, or a thrombus located in popliteal vein or more proximal. Confirmation requires imaging with techniques that include ultrasound or CT scan. Distal DVTs were excluded.

### Confirmed pulmonary embolus

Segmental or multi-sub-segmental pulmonary emboli that is confirmed using CT pulmonary angiography or has a high probability ventilation: perfusion lung scan

### Confirmed ischemic cerebrovascular event

An acute ischemic stroke is defined as central nervous system infarction defined as brain, spinal cord, or retinal cell death attributable to ischemia, based on:

- Pathological, imaging, or other objective evidence of cerebral, spinal cord, or retinal focal ischemic injury in a defined vascular distribution; OR
- Clinical evidence of cerebral, spinal cord, or retinal focal ischemic injury based on symptoms persisting  $\geq 24$  hours or until death, and other etiologies excluded. (Note: CNS infarction includes types I and II hemorrhagic infarctions) OR
- Infarction or hemorrhage in the brain, spinal cord, or retina because of thrombosis of a cerebral venous structure. Symptoms or signs caused by reversible edema without infarction or hemorrhage do not qualify as stroke.

### Mesenteric ischemia

Mesenteric Ischemia for arterial or venous mesenteric ischemia diagnosed on contrast imaging by CT or angiography or diagnosed at laparotomy or via laparoscopy.

### Limb ischemia

Limb ischemia if evidence of acute limb ischemia sufficient to require surgical revascularization including bypass procedure, intraarterial thrombolysis, or embolectomy; amputation of a limb due to acute ischemia; or decision to withdraw of limit treatment because of acute limb ischemia. It is not sufficient for there to be evidence of limb ischemia that does not result in surgical intervention or determine a decision to institute palliative care. Ischemia attributed to vasopressor medication is insufficient unless also meets the above definition.

### Systemic arterial thrombosis or embolism

Clinical evidence of sudden significant worsening of organ or limb perfusion and either confirmation of arterial obstruction (e.g. by imaging, hemodynamics, intraoperative findings or pathology evaluation) or requirement for intervention (thrombolysis, thrombectomy or urgent bypass).

#### All thrombotic events

A composite dichotomous endpoint of deep vein thrombosis, pulmonary embolism, ischemic cerebrovascular event, myocardial infarction, or systemic arterial thromboembolism diagnosed at any time during the index hospitalization or death in hospital

#### **1.4 Classification of anticoagulation dosing**

The dose of anticoagulation administered for all patients was classified as low dose prophylaxis, intermediate dose prophylaxis and therapeutic using the categories outlined in eTable 1. Patients who received a dose higher than intermediate, but lower than therapeutic dose, were classified as subtherapeutic. The first dose administered, excluding one-off or stat doses, after randomization and within first 48 hours was used to classify anticoagulation dosing. Anticoagulant doses were classified as either therapeutic or less than therapeutic for the analysis of interaction between antiplatelet intervention and anticoagulation strategy (Data presented in eTable 9).

**eTable 1. Categories of Anticoagulation Intensity According to Anticoagulant and Dose**

|                                               | Low dose prophylaxis           | Intermediate dose prophylaxis             | Therapeutic                                             |
|-----------------------------------------------|--------------------------------|-------------------------------------------|---------------------------------------------------------|
| <b>Enoxaparin</b>                             |                                |                                           |                                                         |
| Weight <50kg                                  |                                |                                           |                                                         |
| CrCl ≥ 30 ml/min                              | 20 or 30mg daily               | 1 mg/kg daily OR 20-40 mg BID             | 1 mg/kg BID OR ≥ 1.5 mg/kg daily                        |
| BMI < 40kg/m <sup>2</sup> OR weight 50-120 kg |                                |                                           |                                                         |
| CrCl ≥ 30 ml/min                              | 40mg daily                     | 40mg OR 0.5 mg/kg BID OR 1 mg/kg daily    | 1 mg/kg BID OR 1.5 mg/kg daily                          |
| BMI ≥ 40 kg/m <sup>2</sup> OR weight ≥ 120 kg |                                |                                           |                                                         |
| CrCl ≥ 30 ml/min                              | 30-40 mg BID OR 40-60 mg daily | 60mg OR 0.5 mg/kg BID OR 1 mg/kg daily    | 1 mg/kg BID or ≥ 1.5 mg/kg daily                        |
| <b>Unfractionated heparin</b>                 |                                |                                           |                                                         |
| BMI < 40kg/m <sup>2</sup> OR weight < 120kg   |                                |                                           |                                                         |
|                                               | 2500-5000 units BID or TID     | 7500 units TID                            | Continuous infusion per protocol                        |
| BMI > 40kg/m <sup>2</sup> OR weight > 120kg   |                                |                                           |                                                         |
|                                               | 5000-7500 units BID or TID     | 10,000 units BID                          | Continuous infusion per protocol                        |
| <b>Dalteparin</b>                             |                                |                                           |                                                         |
| BMI <40 kg/m <sup>2</sup> OR weight < 120 kg  |                                |                                           |                                                         |
| CrCl ≥ 30ml/min                               | 2500-5000 units daily          | 5000 units BID OR 7500 units daily        | 100 units/kg BID OR 200 units/kg daily OR ≥ 18000 daily |
| BMI ≥ 40kg/m <sup>2</sup> OR weight ≥ 120kg   |                                |                                           |                                                         |
| CrCl ≥ 30 ml/min                              | 5000-7500 units daily          | 5000-7500 units BID OR 100 units/kg daily | 100 units/kg BID OR 200 units/kg daily OR ≥ 18000 daily |
| <b>Tinzaparin</b>                             |                                |                                           |                                                         |
| BMI < 40kg/m <sup>2</sup> OR weight 50-120kg  |                                |                                           |                                                         |
|                                               | ≤ 4500 units daily             | ≤ 4500 units BID                          | 175 units/kg daily OR ≥ 80 units/kg BID                 |
| BMI ≥ 40kg/m <sup>2</sup> OR weight ≥ 120kg   |                                |                                           |                                                         |
|                                               | 4500-8000 units daily          | ≤ 8000 units BID                          | 175 units/kg daily OR ≥ 80 units/kg BID                 |

Patients with CrCl < 30 mL/min were excluded from participation in the antiplatelet domain

## **1.5 Additional Statistical Methods:**

### *Analysis populations:*

As described in the Statistical Analysis Plan, the primary analysis was conducted on all patients with confirmed or suspected Covid-19 randomized in one or more domains within the pandemic stratum. Patients in both critically ill and non-critically ill groups were included in the model. The model estimated treatment effects for each of the patient groups (critically ill and non-critically ill), utilizing a Bayesian hierarchical approach that shares information across groups. When consistent effects are observed for the groups, the posterior distribution for each intervention group effect is shrunk towards the overall estimate, resulting in borrowing between groups. The model estimated a pooled treatment effect of the antiplatelet interventions in critically ill patients (following the equivalence trigger) and nested treatment effects of the antiplatelet interventions in non-critically ill patients using a Bayesian hierarchical approach. As the primary model included information about assignment in patient groups where randomization was ongoing and blinded to the investigators, the primary analysis was run by the fully unblinded Statistical Analysis Committee (SAC), who conduct all protocol-specified trial adaptive analyses and report results to the DSMB. The model included covariate terms reflecting each patient's domain eligibility and randomization, so that each treatment effect was estimated only from patients that were randomized within the domain and only directly comparing specific interventions available at each site. Patients enrolled outside the Antiplatelet Domain did not contribute to estimates of antiplatelet treatment effect but did contribute to the estimates of the covariate effects. As such, only patients randomized to the “no antiplatelet treatment” intervention within the Antiplatelet Domain served as controls for the analysis of antiplatelet therapeutic efficacy. In doing so, only concurrent controls were analyzed to determine efficacy of antiplatelet treatment. eFigure 1 depicts the randomized allocation of subjects to aspirin, P2Y12 inhibitor, or “no antiplatelet agent” throughout the duration of the trial in two-week increments.

In addition to the primary analysis conducted by the SAC, multiple sensitivity analyses were conducted by the investigator team who remain blinded to results of on-going randomization in concomitant domains. These analyses include only patients and interventions randomised in domains that have ceased recruitment (Unblinded ITT population). A sensitivity analysis of the primary outcome was repeated in independent models using data from patients in the critically ill and non-critically ill Covid-19 patient groups separately. As the primary analysis was conducted on pooled antiplatelet interventions, a sensitivity analysis was performed to understand independent effects of aspirin or P2Y12 inhibitors. For these analyses there was no adjustment for borrowing from the non-critically ill participants. The Bayesian probability distributions for the pooled antiplatelet odds ratio effect on the primary outcome in the Unblinded ITT analysis model are shown in eFigure 2.

Further sensitivity analyses assessed whether results were modified by excluding patients who were randomized as suspected Covid-19 but ultimately did not document SARS-CoV-2 PCR test positivity, or whether results were modified by excluding site and time effects from the model. As described in the statistical design plan, the analytical model includes site and time covariate terms to account for variability in treatment effect according to site (random effect) and to variation in the endpoint over time (fixed effect).

As the incidence of major bleeding is an important secondary outcome, additional sensitivity analyses included patients in the critically ill and non-critically ill who were also randomized in the therapeutic anticoagulation domain. In addition, as thrombotic complications may in part be mediated by inflammation, the use of interleukin-6 receptor antagonists may modulate thrombosis risk. Thus, the possibility of an interaction between interleukin-6 receptor antagonists and antiplatelet treatment was evaluated in a sensitivity analysis. Exploratory analyses were performed to assess interaction between antiplatelet interventions and all other unblinded domains with sufficient data available. The model was adjusted as described for the primary analysis.

### *Subgroup analyses*

Treatment effect was examined in pre-specified subgroup analyses (See Protocol Appendix Statistical Analysis Plan) including age, sex, and requirement for invasive mechanical ventilation at baseline. Subgroups according to baseline serum troponin levels and chronic kidney disease were planned but data were not available at the time of analysis. To assess for potential heterogeneity of treatment effect according to anticoagulation dose, subgroups were predefined based on the baseline anticoagulation dose equivalent (low dose prophylaxis, intermediate dose prophylaxis, subtherapeutic/therapeutic dose anticoagulation). A second post-hoc subgroup analysis was performed on subgroups defined as therapeutic or “less than therapeutic” doses of anticoagulant (comprising low dose prophylaxis, intermediate dose prophylaxis, or sub-therapeutic anticoagulation). For each subgroup analysis, all subgroups were included in a single model that estimated a separate treatment effect by subgroup. The posterior distribution for each subgroup effect and 95% credible intervals are reported.

There was no imputation of missing outcomes in either primary or secondary analyses. Cases were excluded on an analysis-by-analysis basis, i.e. patients missing outcome data were included in treatment compliance and safety analyses. The secondary outcomes were also analyzed in the unblinded ITT model. The primary safety analysis compared the proportion of patients who developed one or more serious adverse thrombotic or major bleeding events across groups. Patients with missing subgroup variables were included in a “Missing” subgroup.

## **eAppendix 2. Supplementary Results**

### ***Site Participation in the Antiplatelet Domain***

During the study period, October 30, 2020 to June 23, 2021, 105 sites from 8 countries were open for enrollment in the antiplatelet domain.

### ***Supplemental Data***

Provided below are the secondary and sensitivity analyses of the primary outcome (days alive and free of organ support) and secondary outcomes of hospital mortality, death or major thrombotic events, and major bleeding in the critically ill participants where appropriate. Data from critically ill participants follow brief presentation of the primary and secondary analyses for the non-critically ill population.

eTable 2 presents the baseline characteristics of all participants in the antiplatelet domain (critically ill and non-critically ill). Supplemental data in all tables are presented as adjusted odds or hazard ratios where appropriate with 95% credible intervals, as well as the superiority of pooled antiplatelet group compared to no antiplatelet treatment unless otherwise noted.

Enrollment of non-critically ill participants was halted on June 23, 2021 at the same time as critically ill patients due to low recruitment and after release of RECOVERY trial data demonstrating futility of aspirin treatment in hospitalized patients with Covid-19. Baseline characteristics of non-critically ill participants are presented in eTable 2. Primary and secondary outcomes of the non-critically ill participants are shown in eTable 3 and serious adverse events, major bleeding, and thrombotic outcomes are presented in eTable 4. The non-critically ill population in the trial was too small to draw conclusions about therapeutic effects of antiplatelet interventions.

eTable 5 presents secondary outcomes of the critically ill subjects including progression of non-intubated participants to require invasive mechanical ventilation, ECMO, or death; freedom from respiratory or cardiovascular support; length of stay; and WHO scale at day 14. eTable 6 depicts the occurrence of serious adverse events, major bleeding, and thrombotic events for individual antiplatelet interventions in critically ill patients.

### ***Interaction with Other Domains and Subgroups***

The potential interaction of antiplatelet intervention and anticoagulation strategy was of particular importance in the analysis given the potential increased risk of bleeding in patients receiving combination antithrombotic therapy. Of note, patients >75 years of age were excluded from the Antiplatelet Domain if eligible for the Therapeutic Anticoagulation Domain given the increased bleeding risk in that age group. 122 participants were co-enrolled in the antiplatelet and anticoagulation domains with 35 patients randomized



to an active antiplatelet therapy and therapeutic anticoagulation. Analysis of the primary outcome (OSFD) and in-hospital mortality suggested a potentially harmful effect when receiving both antiplatelet treatment and therapeutic anticoagulation (eTable 8). Further post-hoc analysis of the effect of antiplatelet intervention stratified by anticoagulation dose suggested that antiplatelet therapy had a 97% posterior probability of improving in-hospital survival (OR 1.33 [0.99, 1.79]) in patients receiving prophylactic dose anticoagulant compared with likely harm (90% posterior probability) in patients receiving therapeutic anticoagulation (OR 0.63 [0.31, 1.28], eTable 9, eFigure 3). Analysis of the primary outcome of organ support free days by prespecified subgroups of ventilation status, age and baseline anticoagulation status is shown in eTable 7. Due to missing data, the other pre-specified subgroups defined by troponin levels and renal function, have yet not been analyzed but are planned for incorporation into subsequent manuscripts.

**eTable 2. Participant Characteristics at Baseline**

|                                                                      | Critically Ill Patients |                         |                                   | Non-Critically Ill Patients |                      |                                 |
|----------------------------------------------------------------------|-------------------------|-------------------------|-----------------------------------|-----------------------------|----------------------|---------------------------------|
|                                                                      | Aspirin<br>(n = 565)    | Inhibitors<br>(n = 455) | Control <sup>a</sup><br>(n = 529) | Aspirin<br>(n=90)           | Inhibitors<br>(n=67) | Control <sup>a</sup><br>(n=109) |
| <b>Age in years, mean (SD)</b>                                       | 55.5 (12.1)             | 56.3 (11.8)             | 55.0 (12.0)                       | 52.0 (12.8)                 | 53.9 (12.1)          | 53.4 (13.4)                     |
| <b>Male sex, n (%)</b>                                               | 366 (64.8)              | 316 (69.5)              | 346 (65.4)                        | 57 (63.3)                   | 43 (64.2)            | 75 (68.8)                       |
| <b>Race / Ethnicity <sup>b</sup> - n / N (%)</b>                     |                         |                         |                                   |                             |                      |                                 |
| White                                                                | 352 / 460<br>(76.5)     | 307 / 372<br>(82.5)     | 309 / 419<br>(73.7)               | 9 / 12 (75.0)               | 6 / 10 (60.0)        | 7 / 8 (87.5)                    |
| Asian                                                                | 46 / 460<br>(10.0)      | 36 / 372<br>(9.7)       | 58 / 419<br>(13.8)                | 1 / 12 (8.3)                | 3 / 10 (30.0)        | 0 / 8 (0)                       |
| Black                                                                | 16 / 460 (3.5)          | 9 / 372 (2.4)           | 16 / 419<br>(3.8)                 | 1 / 12 (8.3)                | 0 / 10 (0)           | 0 / 8 (0)                       |
| Mixed                                                                | 19 / 460 (4.1)          | 5 / 372 (1.3)           | 10 / 419<br>(2.4)                 | 0 / 12 (0)                  | 0 / 10 (0)           | 0 / 8 (0)                       |
| Other                                                                | 27 / 460 (5.9)          | 15 / 372<br>(4.0)       | 26 / 419<br>(6.2)                 | 1 / 12 (8.3)                | 1 / 10 (10.0)        | 1 / 8 (12.5)                    |
| <b>Body-mass index <sup>c</sup>, median (IQR)</b>                    | 31.7 (27.4,<br>37.6)    | 31.3 (26.9,<br>37.2)    | 31.1 (27.0,<br>35.9)              | 28.4 (25.3,<br>31.2)        | 29.4 (26.1,<br>32.8) | 28.1 (25.2,<br>30.4)            |
| <b>APACHE II score, median (IQR)</b>                                 | 12.0 (8.0,<br>17.0)     | 12.0 (8.0,<br>18.0)     | 12.0 (8.0,<br>17.0)               | 5.0 (2.0 - 8.0)             | 5.0 (3.0 - 9.0)      | 5.0 (3.0 -<br>8.0)              |
| <b>Confirmed SARS-CoV-2 infection <sup>d</sup>, n / N (%)</b>        | 505 / 519<br>(97.3)     | 400 / 415<br>(96.4)     | 465 / 477<br>(97.5)               | 79 / 80<br>(98.8)           | 61 / 63<br>(96.8)    | 97 / 98<br>(99.0)               |
| <b>Preexisting condition, n / N (%)</b>                              |                         |                         |                                   |                             |                      |                                 |
| Diabetes                                                             | 134 / 562<br>(23.8)     | 93 / 449<br>(20.7)      | 112 / 521<br>(21.5)               | 18 / 90<br>(20.0)           | 18 / 67<br>(26.9)    | 18 / 106<br>(17.0)              |
| Respiratory disease                                                  | 113 / 562<br>(20.1)     | 88 / 449<br>(19.6)      | 97 / 522<br>(18.6)                | 9 / 90 (10.0)               | 15 / 67<br>(22.4)    | 16 / 106<br>(15.1)              |
| Kidney disease                                                       | 16 / 528 (3.0)          | 18 / 416<br>(4.3)       | 18 / 485<br>(3.7)                 | 1 / 85 (1.2)                | 3 / 61 (4.9)         | 3 / 102 (2.9)                   |
| Severe cardiovascular disease                                        | 18 / 552 (3.3)          | 23 / 437<br>(5.3)       | 26 / 517<br>(5.0)                 | 0 / 90 (0)                  | 2 / 67 (3.0)         | 1 / 106 (0.9)                   |
| Any immunosuppressive condition                                      | 23 / 562 (4.1)          | 19 / 449<br>(4.2)       | 23 / 522<br>(4.4)                 | 3 / 90 (3.3)                | 0 / 67 (0)           | 4 / 106 (3.8)                   |
| Liver cirrhosis / failure                                            | 1 / 552 (0.2)           | 3 / 437 (0.7)           | 0 / 517 (0.0)                     | 0 / 90 (0)                  | 0 / 67 (0)           | 0 / 106 (0)                     |
| <b>Time to enrollment, median (IQR)</b>                              |                         |                         |                                   |                             |                      |                                 |
| From hospital admission, days                                        | 1.5 (0.9, 3.0)          | 1.8 (1.0, 3.5)          | 1.8 (0.9, 3.7)                    | 1.0 (0.8, 1.9)              | 1.0 (0.7, 1.9)       | 1.0 (0.8, 1.6)                  |
| From ICU admission, hours                                            | 17.2 (9.8,<br>22.4)     | 17.9 (12.0,<br>23.5)    | 18.2 (10.7,<br>23.9)              | 19.0 (8.5,<br>22.1)         | 12.5 (5.4,<br>18.8)  | 17.6 (11.5,<br>22.2)            |
| <b>Acute respiratory support, n (%)</b>                              |                         |                         |                                   |                             |                      |                                 |
| None / supplemental oxygen                                           | 0 (0.0)                 | 0 (0.0)                 | 1 (0.2)                           | 80 (88.9)                   | 54 (80.6)            | 97 (89.0)                       |
| High-flow nasal cannula                                              | 125 (22.1)              | 121 (26.6)              | 132 (25.0)                        | 2 (2.2)                     | 5 (7.5)              | 1 (0.9)                         |
| Noninvasive ventilation only                                         | 227 (40.2)              | 173 (38.0)              | 202 (38.2)                        | 8 (8.9)                     | 8 (11.9)             | 11 (10.1)                       |
| Invasive mechanical ventilation                                      | 213 (37.7)              | 161 (35.4)              | 194 (36.7)                        | 1 (1.1)                     | 0 (0)                | 3 (2.8)                         |
| PaO <sub>2</sub> / FiO <sub>2</sub> , median (IQR)                   | 115 (86, 148)           | 118 (90, 163)           | 113 (89, 147)                     | 129 (86, 198)               | 139 (104,<br>205)    | 128 (94,<br>171)                |
| <b>Vasopressor support - n (%)</b>                                   | 121 (21.4)              | 72 (15.8)               | 88 (16.6)                         | 0 (0)                       | 0 (0)                | 0 (0)                           |
| <b>Median laboratory values (IQR) <sup>e</sup></b>                   |                         |                         |                                   |                             |                      |                                 |
| C-reactive protein, µg/mL                                            | 118 (62, 180)           | 109 (59, 179)           | 113 (60,180)                      | 73 (31, 134)                | 81 (41, 126)         | 81 (51, 135)                    |
| D-dimer, ng/mL                                                       | 972 (500,<br>2599)      | 850 (386,<br>2297)      | 898 (490,<br>2705)                | 500 (451,<br>827)           | 500 (444,<br>1065)   | 659 (500,<br>1515)              |
| Platelet count, x10 <sup>9</sup> /L                                  | 251 (194,<br>313)       | 239 (184,<br>312)       | 253 (196,<br>327)                 | 228 (193,<br>277)           | 234 (176,<br>298)    | 218 (185,<br>285)               |
| <b>Concomitant therapies within 48hr of randomization, n / N (%)</b> |                         |                         |                                   |                             |                      |                                 |
| Steroids                                                             | 552 / 562<br>(98.2)     | 433 / 448<br>(96.7)     | 511 / 521<br>(98.1)               | 88 / 90<br>(97.8)           | 60 / 67<br>(89.6)    | 97 / 106<br>(91.5)              |
| Remdesivir                                                           | 113 / 562<br>(20.1)     | 87 / 448<br>(19.4)      | 126 / 521<br>(24.2)               | 28 / 90<br>(31.1)           | 13 / 67<br>(19.4)    | 25 / 106<br>(23.6)              |
| <b>Immunomodulators</b>                                              |                         |                         |                                   |                             |                      |                                 |
| Tocilizumab                                                          | 248 / 562<br>(44.1)     | 201 / 448<br>(44.9)     | 217 / 521<br>(41.7)               | 8 / 90 (8.9)                | 11 / 67<br>(16.4)    | 10 / 106<br>(9.4)               |
| Sarilumab                                                            | 66 / 562<br>(11.7)      | 45 / 448<br>(10.0)      | 54 / 521<br>(10.4)                | 2 / 90 (2.2)                | 0 / 67 (0)           | 0 / 106 (0)                     |

|                                | (n = 565)           | (n = 455)           | (n = 529)           | (n=90)            | (n=67)            | (n=109)            |
|--------------------------------|---------------------|---------------------|---------------------|-------------------|-------------------|--------------------|
| <b>Anticoagulants</b>          |                     |                     |                     |                   |                   |                    |
| <b>Category</b>                |                     |                     |                     |                   |                   |                    |
| LMWH                           | 512 / 565<br>(90.6) | 395 / 455<br>(86.8) | 480 / 529<br>(90.7) | 81 / 90<br>(90.0) | 57 / 67<br>(85.1) | 92 / 109<br>(84.4) |
| UFH                            | 8 / 565 (1.4)       | 8 / 455 (1.8)       | 8 / 529 (1.5)       | 0 / 90 (0)        | 0 / 67 (0)        | 0 / 109 (0)        |
| DOAC                           | 2 / 565 (0.4)       | 5 / 455 (1.1)       | 1 / 529 (0.2)       | 0 / 90 (0)        | 0 / 67 (0)        | 3 / 109 (2.8)      |
| Unknown                        | 43 / 565 (7.6)      | 47 / 455<br>(10.3)  | 40 / 529<br>(7.6)   | 9 / 90 (10.0)     | 10 / 67<br>(14.9) | 14 / 109<br>(12.8) |
| <b>Dose</b>                    |                     |                     |                     |                   |                   |                    |
| Low prophylactic dose          | 112 / 565<br>(19.8) | 87 / 455<br>(19.1)  | 75 / 529<br>(14.2)  | 24 / 90<br>(26.7) | 23 / 67<br>(34.3) | 21 / 109<br>(19.3) |
| Intermediate prophylactic dose | 312 / 565<br>(55.2) | 214 / 455<br>(47.0) | 312 / 529<br>(59.0) | 38 / 90<br>(42.2) | 19 / 67<br>(28.4) | 57 / 109<br>(52.3) |
| Subtherapeutic                 | 22 / 565 (3.9)      | 21 / 455<br>(4.6)   | 24 / 529<br>(4.5)   | 1 / 90 (1.1)      | 0 / 67 (0)        | 0 / 109 (0)        |
| Therapeutic                    | 54 / 565 (9.6)      | 65 / 455<br>(14.3)  | 56 / 529<br>(10.6)  | 15 / 90<br>(16.7) | 10 / 67<br>(14.9) | 14 / 109<br>(12.8) |
| Unknown                        | 65 / 565<br>(11.5)  | 68 / 455<br>(14.9)  | 62 / 529<br>(11.7)  | 12 / 90<br>(13.3) | 15 / 67<br>(22.4) | 17 / 109<br>(15.6) |

Percentages may not sum to 100 because of rounding. SD denotes standard deviation; APACHE, Acute Physiology and Chronic Health Evaluation; IQR, interquartile range; ECMO, extracorporeal membrane oxygenation; DOAC, direct oral anticoagulants; LMWH, low-molecular weight heparin; UFH, unfractionated heparin.

<sup>a</sup> Control patients include all patient randomized to control who were also eligible to be randomized to antiplatelet.

<sup>b</sup> Data collection not approved in Canada and continental Europe. "Other" includes "declined" and "multiple".

<sup>c</sup> Body-mass index is the weight in kilograms divided by the square of the height in meters.

<sup>d</sup> SARS-CoV2 infection was confirmed by respiratory tract polymerase chain reaction test.

<sup>e</sup> Laboratory results available when captured for clinical care. Number of patients varies with each test. Missingness ~15% for CRP, ~40% for D-Dimer, and ~4% for platelet count

**eTable 3. Primary and Secondary Analyses of Non-Critically Ill Patients**

|                                                               | <b>Pooled<br/>Antiplatelet</b> | <b>Aspirin</b>    | <b>P2Y12<br/>Inhibitor</b> | <b>No Antiplatelet<br/>Therapy</b> |
|---------------------------------------------------------------|--------------------------------|-------------------|----------------------------|------------------------------------|
| <b>Organ Support Free Days to Day 21</b> <sup>1,2</sup>       |                                |                   |                            |                                    |
| Number of patients with known outcome                         |                                | 90                | 67                         | 106                                |
| Median (IQR)                                                  |                                | 22 (18, 22)       | 22 (22, 22)                | 22 (18.5, 22)                      |
| Adjusted proportional odds ratio (95% CrI)                    |                                | 0.94 (0.56, 1.35) | 0.97 (0.59, 1.50)          | 1 (Reference)                      |
| Probability of futility <sup>3</sup> , %                      |                                | 90.9              | 85.8                       | -                                  |
| Probability of efficacy <sup>4</sup> , %                      |                                | 36.4              | 43.7                       | -                                  |
| <b>Survival to Hospital Discharge</b>                         |                                |                   |                            |                                    |
| Number of patients/total number (%)                           |                                | 78/90 (86.6)      | 63/67 (94.0)               | 87/106 (82.1)                      |
| Adjusted odds ratio (95% CrI)                                 |                                | 1.23 (0.70, 2.04) | 1.29 (0.77, 2.52)          | 1 (Reference)                      |
| Adjusted absolute risk difference (%; 95% CrI)                |                                | 3.2 (-4.7, 12.9)  | 4.1 (-3.5, 17.6)           | -                                  |
| Probability of efficacy <sup>4</sup> , %                      |                                | 79.50             | 85.6                       | -                                  |
| <b>90-Day Mortality</b>                                       |                                |                   |                            |                                    |
| Adjusted hazard ratio                                         |                                |                   |                            |                                    |
| Mean (SD)                                                     | 1.2 (0.44)                     | -                 | -                          | 1 (Reference)                      |
| Median (95% CrI)                                              | 1.13 (0.57, 2.27)              | -                 | -                          | 1 (Reference)                      |
| Probability of efficacy <sup>4</sup> , %                      | 63.7                           | -                 | -                          | -                                  |
| <b>Progression to Intubation, ECMO, or Death</b> <sup>5</sup> |                                |                   |                            |                                    |
| Number of patients/total number (rate) <sup>6</sup>           | 11/76 (0.145)                  | 10/53 (0.189)     | 1/23 (0.043)               | 19/66 (0.288)                      |
| Death, n (%)                                                  | 10 (13.2)                      | 9 (17)            | 1 (4.3)                    | 17 (25.8)                          |
| Intubation, n (%)                                             | 10 (13.2)                      | 9 (17)            | 1 (4.3)                    | 12 (18.2)                          |
| ECMO, n (%)                                                   | 1 (1.3)                        | 1 (1.9)           | 0 (0)                      | 1 (1.5)                            |
| Adjusted odds ratio (95% CrI)                                 | 1.15 (0.87, 1.53)              | -                 | -                          | 1 (Reference)                      |
| Probability of efficacy <sup>4</sup> , %                      | 83.1                           | -                 | -                          | -                                  |
| <b>Days Free from Organ Support</b>                           |                                |                   |                            |                                    |
| <b>Respiratory</b>                                            |                                |                   |                            |                                    |
| Median (IQR)                                                  |                                | 22 (18, 22)       | 22 (22, 22)                | 22 (20,22)                         |
| Adjusted odds ratio                                           |                                |                   |                            |                                    |
| Mean (SD)                                                     | 0.93 (0.29)                    | -                 | -                          | 1 (Reference)                      |
| Median (95% CrI)                                              | 0.89 (0.49, 1.60)              | -                 | -                          | 1 (Reference)                      |
| Probability of efficacy <sup>4</sup> , %                      | 41.2                           | -                 | -                          | -                                  |
| <b>Cardiovascular</b>                                         |                                |                   |                            |                                    |
| Median, (IQR)                                                 |                                | 22 (22, 22)       | 22 (22, 22)                | 22 (22,22)                         |
| Adjusted odds ratio                                           |                                |                   |                            |                                    |
| Mean (SD)                                                     | 0.96 (0.36)                    | -                 | -                          | 1(Reference)                       |
| Median (95% CrI)                                              | 0.9 (0.44, 1.85)               | -                 | -                          | 1 (Reference)                      |
| Probability of efficacy <sup>4</sup> , %                      | 40.0                           | -                 | -                          | -                                  |
| <b>Length of Stay - Hospital</b>                              |                                |                   |                            |                                    |
| Adjusted odds ratio                                           |                                |                   |                            |                                    |
| Mean (SD)                                                     | 0.94 (0.14)                    | -                 | -                          | 1 (Reference)                      |
| Median (95% CrI)                                              | 0.93 (0.70, 1.24)              | -                 | -                          | 1 (Reference)                      |
| Probability of efficacy <sup>4</sup> , %                      | 30.2                           | -                 | -                          | -                                  |
| <b>WHO Scale at Day 14</b>                                    |                                |                   |                            |                                    |
| Adjusted odds ratio                                           |                                |                   |                            |                                    |
| Mean (SD)                                                     | 0.91 (0.29)                    | -                 | -                          | 1 (Reference)                      |
| Median (95% CrI)                                              | 0.87 (0.48, 1.59)              | -                 | -                          | 1 (Reference)                      |
| Probability of efficacy <sup>4</sup> , %                      | 32.2                           | -                 | -                          | -                                  |

<sup>1</sup>Composite ordinal scale consisting of survival to hospital discharge and days free of organ support to day 21. Odds ratio>1 indicates a benefit from treatment. Probabilities of efficacy (proportional odds ratio>1), harm (proportional odds ratio<1), and futility (proportional odds ratio<1.2) are computed from the posterior distribution.

<sup>2</sup>Dynamic borrowing was used across illness severity (i.e. critically and non-critically ill patients), whereby like treatment effects are shrunk together based on their degree of similarity - accordingly, observations about treatment effect are shared between groups

<sup>3</sup> Futility defined by OR < 1.2

<sup>4</sup> Efficacy defined by OR >1

<sup>5</sup>Data and analysis are restricted to patients free of intubation and ECMO at baseline

<sup>6</sup>One subject may progress on more than one component of the composite outcome

**eTable 4. Serious Adverse Events, Major Bleeding, and Thrombotic Events in Non-Critically Ill Patients**

|                                                   | <b>Pooled Antiplatelet</b> | <b>Aspirin</b>    | <b>P2Y12 Inhibitor</b> | <b>No Antiplatelet Therapy</b> |
|---------------------------------------------------|----------------------------|-------------------|------------------------|--------------------------------|
| <b>Serious Adverse Events</b>                     |                            |                   |                        |                                |
| Number of Events/Number of Patients (Rate)        | 0/157 (0)                  | 0/90 (0)          | 0/67 (0)               | 0/109 (0)                      |
| <b>Major Bleeding</b>                             |                            |                   |                        |                                |
| Number of Events/Number of Patients (Rate)        | 1/157 (0.006)              | 1/90 (0.004)      | 0/67 (0)               | 0/105 (0)                      |
| <b>Thrombotic Events or Death</b>                 |                            |                   |                        |                                |
| Number of Events/Number of Patients (Rate)        | 20/157 (0.127)             | 13/90 (0.144)     | 7/67 (0.104)           | 21/106 (0.198)                 |
| Adjusted odds ratio                               |                            |                   |                        |                                |
| Mean (SD)                                         | 1.11 (0.44)                | 1.18 (0.51)       | 1.15 (0.67)            | 1 (Reference)                  |
| Median (95% CrI)                                  | 1.03 (0.49, 2.18)          | 1.09 (0.49, 2.44) | 0.99 (0.36, 2.86)      | 1 (Reference)                  |
| Probability of efficacy <sup>1</sup> , %          | 53.4                       | 58.4              | 49.6                   | -                              |
| <b>Thrombotic Events<sup>2</sup></b>              |                            |                   |                        |                                |
| Number of Patients with at least one event (Rate) | 6/157 (0.038)              | 2/90 (0.03)       | 4/67 (0.022)           | 2/106 (0.019)                  |
| Adjusted odds ratio                               |                            |                   |                        |                                |
| Mean (SD)                                         | -                          | 1.11 (0.97)       | 0.58 (0.46)            | 1 (Reference)                  |
| Median (95% CrI)                                  | -                          | 0.82 (0.21, 3.66) | 0.46 (0.12, 1.79)      | 1 (Reference)                  |
| Probability of efficacy <sup>1</sup> , %          | -                          | 39.7              | 12.6                   | -                              |
| <b>Thrombotic Event Breakdown (n)<sup>3</sup></b> |                            |                   |                        |                                |
| Pulmonary Embolism                                | 5                          | 1                 | 4                      | 1                              |
| Myocardial Infarction                             | 1                          | 1                 | 0                      | 1                              |
| Ischemic Cerebrovascular Accident                 | 0                          | 0                 | 0                      | 0                              |
| Systemic Arterial Thromboembolism                 | 0                          | 0                 | 0                      | 0                              |
| Deep Vein Thrombosis                              | 1                          | 0                 | 1                      | 0                              |

<sup>1</sup> Efficacy defined by odds ratio >1

<sup>2</sup> Number of participants experiencing thrombotic events are presented for each individual intervention.

<sup>3</sup> Participants may have experienced more than one thrombotic event.

**eTable 5. Other Secondary Outcomes for Critically Ill Patients**

|                                                              | Pooled Antiplatelet <sup>1</sup> | No Antiplatelet |
|--------------------------------------------------------------|----------------------------------|-----------------|
| <b>Progression to Intubation, ECMO, or Death<sup>2</sup></b> | N=636                            | N=326           |
| Progressors, Number of patients (%)                          | 265 (41.7)                       | 148 (45.4)      |
| Death (Number of patients (%))                               | 155 (24.4)                       | 98 (30.1)       |
| Intubation, Number of patients (%)                           | 230 (36.2)                       | 133 (40.8)      |
| ECMO, Number of patients (%)                                 | 4 (0.6)                          | 1 (0.3)         |
| Adjusted odds ratio                                          |                                  |                 |
| Mean (SD)                                                    | 1.15 (0.17)                      | 1 (Reference)   |
| Median (95% CrI)                                             | 1.14 (0.86, 1.51)                | 1 (Reference)   |
| Probability of efficacy <sup>3</sup> , %                     | 82.2                             | -               |
| <b>Days Free from Organ Support</b>                          |                                  |                 |
| <b>Respiratory</b>                                           |                                  |                 |
| Median (IQR)                                                 | 7 (-1, 16)                       | 7 (-1, 16)      |
| Adjusted odds ratio                                          |                                  |                 |
| Mean (SD)                                                    | 1.04 (0.1)                       | 1 (Reference)   |
| Median (95% CrI)                                             | 1.04 (0.85, 1.26)                | 1 (Reference)   |
| Probability of efficacy <sup>3</sup> , %                     | 65.2                             | -               |
| <b>Cardiovascular</b>                                        |                                  |                 |
| Median, (IQR)                                                | 19 (-1, 21)                      | 19 (-1, 21)     |
| Adjusted odds ratio                                          |                                  |                 |
| Mean (SD)                                                    | 1.12 (0.12)                      | 1 (Reference)   |
| Median (95% CrI)                                             | 1.11 (0.9, 1.37)                 | 1 (Reference)   |
| Probability of efficacy <sup>3</sup> , %                     | 83.7                             | -               |
| <b>Length of Stay</b>                                        |                                  |                 |
| <b>ICU</b>                                                   |                                  |                 |
| Adjusted odds ratio                                          |                                  |                 |
| Mean (SD)                                                    | 1.05 (0.07)                      | 1 (Reference)   |
| Median (95% CrI)                                             | 1.05 (0.92, 1.20)                | 1 (Reference)   |
| Probability of efficacy <sup>3</sup> , %                     | 76.8                             | -               |
| <b>Hospital</b>                                              |                                  |                 |
| Adjusted odds ratio                                          |                                  |                 |
| Mean (SD)                                                    | 1.05 (0.07)                      | 1 (Reference)   |
| Median (95% CrI)                                             | 1.05 (0.92, 1.20)                | 1 (Reference)   |
| Probability of efficacy <sup>3</sup> , %                     | 74                               | -               |
| <b>WHO Scale at Day 14</b>                                   |                                  |                 |
| Adjusted odds ratio                                          |                                  |                 |
| Mean (SD)                                                    | 1.0 (0.1)                        | 1 (Reference)   |
| Median (95% CrI)                                             | 1.00 (0.82, 1.21)                | 1 (Reference)   |
| Probability of efficacy <sup>3</sup> , %                     | 48.6                             | -               |

IQR – Interquartile Range, CrI – Credible Interval

<sup>1</sup> Aspirin (N=349) and P2Y12 inhibitor (N=287) equivalent

<sup>2</sup> Analysis restricted to patients not receiving mechanical ventilation or ECMO at baseline

<sup>3</sup> Efficacy defined by odds ratio >1

**eTable 6. Serious Adverse Events, Major Bleeding, and Thrombotic Events in Critically Ill Patients**

|                                                                | Pooled Antiplatelet | Aspirin           | P2Y12 Inhibitor   | No Antiplatelet |
|----------------------------------------------------------------|---------------------|-------------------|-------------------|-----------------|
| <b>Serious Adverse Events</b>                                  |                     |                   |                   |                 |
| Number of Events/Number of Patients (Rate)                     |                     | 5/565 (0.009)     | 4/455 (0.009)     | 3/529 (0.006)   |
| Adjusted odds ratio                                            |                     |                   |                   |                 |
| Mean (SD)                                                      | -                   | 1.49 (0.95)       | 1.33 (0.87)       | 1 (Reference)   |
| Median (95% CrI)                                               | -                   | 1.26 (0.42, 3.90) | 1.11 (0.35, 3.53) | 1 (Reference)   |
| Probability of efficacy <sup>1</sup> , %                       | -                   | 34.3              | 41.9              | -               |
| <b>Major Bleeding</b>                                          |                     |                   |                   |                 |
| Number of Events/Number of Patients (Rate)                     | 21/1002 (0.02)      | 11/559 (0.02)     | 10/443 (0.023)    | 2/517 (0.004)   |
| Adjusted odds ratio                                            |                     |                   |                   |                 |
| Mean (SD)                                                      | 3.45 (1.88)         | 2.63 (1.32)       | 2.81 (1.47)       | 1 (Reference)   |
| Median (95% CrI)                                               | 2.97 (1.23, 8.28)   | 2.34 (0.93, 5.93) | 2.50 (0.95, 6.56) | 1 (Reference)   |
| Probability of efficacy <sup>1</sup> , %                       | 0.1                 | 3.5               | 3.1               | -               |
| <b>Thrombotic Events or Death</b>                              |                     |                   |                   |                 |
| Number of Events/Number of Patients (Rate)                     | 355/1011 (0.351)    | 204/563 (0.362)   | 151/448 (0.337)   | 212/521 (0.407) |
| Adjusted odds ratio                                            |                     |                   |                   |                 |
| Mean (SD)                                                      | 0.71 (0.09)         | 0.70 (0.10)       | 0.73 (0.12)       | 1 (Reference)   |
| Median (95% CrI)                                               | 0.70 (0.54, 0.90)   | 0.69 (0.52, 0.93) | 0.73 (0.53, 0.99) | 1 (Reference)   |
| Probability of efficacy <sup>1</sup> , %                       | 99.7                | 99.3              | 98.0              | -               |
| <b>Thrombotic Events<sup>2</sup></b>                           |                     |                   |                   |                 |
| Number of Patients with at least one event (Rate) <sup>3</sup> |                     | 69/556 (0.124)    | 43/440 (0.098)    | 65/513 (0.127)  |
| Adjusted odds ratio <sup>4</sup>                               |                     |                   |                   |                 |
| Mean (SD)                                                      | -                   | 1.08 (0.23)       | 0.78 (0.19)       | 1 (Reference)   |
| Median (95% CrI)                                               | -                   | 1.07 (0.71, 1.59) | 0.75 (0.47, 1.21) | 1 (Reference)   |
| Probability of efficacy <sup>1</sup> , %                       | -                   | 38.2              | 88.3              | -               |
| <b>Thrombotic Event Breakdown (n)</b>                          |                     |                   |                   |                 |
|                                                                | -                   | 76                | 49                | 67              |
| Pulmonary Embolism                                             | -                   | 47                | 25                | 49              |
| Myocardial Infarction                                          | -                   | 9                 | 7                 | 5               |
| Ischemic Cerebrovascular Accident                              | -                   | 10                | 6                 | 4               |
| Systemic Arterial Thromboembolism                              | -                   | 2                 | 2                 | 1               |
| Deep Vein Thrombosis                                           | -                   | 8                 | 9                 | 8               |

<sup>1</sup> Efficacy defined by odds ratio <1

<sup>2</sup> Number of participants experiencing thrombotic events are presented for each individual intervention.

<sup>3</sup> Participants may have experienced more than one thrombotic event.

<sup>4</sup> OR>1 indicates harm and OR <1 indicates benefit in analysis of thrombotic events

**eTable 7. Organ Support Free Days (OSFD) Within 21 Days by Age, Mechanical Ventilation Status and Baseline Anticoagulation Dose in Critically Ill Patients**

|                                                | <b>Pooled Antiplatelet</b> | <b>No Antiplatelet</b> |
|------------------------------------------------|----------------------------|------------------------|
| <b>Ventilation</b>                             | N=1020                     | N=529                  |
| No Invasive Mechanical Ventilation, Number (%) | 646 (63.3)                 | 335 (63.3)             |
| Median (IQR)                                   | 13 (0, 17)                 | 12 (-1, 18)            |
| Adjusted OR, Median (95% CrI)                  | 1.05 (0.84, 1.31)          | 1 (Reference)          |
| Probability of efficacy <sup>1</sup> , %       | 67.4                       | -                      |
| Deaths, Number (%) <sup>2</sup>                | 155 (24.3)                 | 98 (29.9)              |
| Invasive Mechanical Ventilation, Number (%)    | 374 (36.7)                 | 194 (36.7)             |
| Median (IQR)                                   | 0 (-1, 11)                 | 0 (-1, 12)             |
| Adjusted OR, Median (95% CrI)                  | 0.97 (0.75, 1.24)          | 1 (Reference)          |
| Probability of efficacy <sup>1</sup> , %       | 39.8                       | -                      |
| Deaths, Number (%) <sup>2</sup>                | 133 (35.8)                 | 69 (35.8)              |
| <b>Age</b>                                     | N=1011                     | N=521                  |
| Age <50, Number (%)                            | 277 (27.4%)                | 148 (28.4%)            |
| Median (IQR)                                   | 13 (0, 17)                 | 14 (0, 18)             |
| Adjusted OR, Median (95% CrI)                  | 0.91 (0.7, 1.2)            | 1 (Reference)          |
| Probability of efficacy <sup>1</sup> , %       | 25.7                       | -                      |
| Deaths, Number (%)                             | 33 (11.9)                  | 24 (16.2)              |
| Age 50-70, Number (%)                          | 614 (60.7)                 | 326 (62.6)             |
| Median (IQR)                                   | 4 (-1, 16)                 | 2.5 (-1, 16)           |
| Adjusted OR, Median (95% CrI)                  | 1.03 (0.82, 1.27)          | 1 (Reference)          |
| Probability of efficacy <sup>1</sup> , %       | 59.5                       | -                      |
| Deaths, Number (%)                             | 195 (31.8)                 | 121 (37.1)             |
| Age ≥70, Number (%)                            | 120 (11.9%)                | 47 (9.0%)              |
| Median (IQR)                                   | -0.5 (-1,13)               | 0 (-1,11)              |
| Adjusted OR, Median (95% CrI)                  | 1.49 (1.00, 2.22)          | 1 (Reference)          |
| Probability of efficacy <sup>1</sup> , %       | 97.5                       | -                      |
| Deaths, Number (%)                             | 60 (50.0)                  | 22 (46.8)              |
| <b>Anticoagulation</b>                         |                            |                        |
| Low dose                                       | N=199                      | N=75                   |
| Median (IQR)                                   | 9 (-1,16)                  | 0 (-1, 16.5)           |
| Adjusted OR, Median (95% CrI)                  | 1.13 (0.71, 1.81)          | 1 (Reference)          |
| Probability of efficacy <sup>1</sup> , %       | 69.6                       | -                      |
| Deaths, Number (%)                             | 56 (28.1)                  | 28 (37.3)              |
| Intermediate dose                              | N=525                      | N=312                  |
| Median (IQR)                                   | 7 (-1, 16)                 | 9 (-1, 17)             |
| Adjusted OR, Median (95% CrI)                  | 0.97 (0.74, 1.25)          | 1 (Reference)          |
| Probability of efficacy <sup>1</sup> , %       | 39.2                       | -                      |
| Deaths, Number (%)                             | 141 (26.9)                 | 100 (32.1)             |
| Sub-therapeutic/Therapeutic                    | N=162                      | N=80                   |
| Median (IQR)                                   | 6.5 (-1, 15)               | 7 (-1,15)              |
| Adjusted OR, Median (95% CrI)                  | 0.98 (0.62, 1.56)          | 1 (Reference)          |
| Probability of efficacy <sup>1</sup> , %       | 46.9                       | -                      |
| Deaths, Number (%)                             | 51 (31.5)                  | 21 (26.2)              |
| Unknown dose                                   | N=125                      | N=54                   |
| Median (IQR)                                   | 6 (-1,17)                  | 0 (-1,13)              |
| Adjusted OR, Median (95% CrI)                  | 1.00 (0.58, 1.78)          | 1 (Reference)          |
| Probability of efficacy <sup>1</sup> , %       | 50.2                       | -                      |
| Deaths, Number (%)                             | 40 (32.0)                  | 18 (33.3)              |

Probabilities represent posterior probabilities of pooled antiplatelet interventions compared to no antiplatelet intervention

SD – Standard Deviation, IQR – Interquartile Range, CrI – Credible Interval, OR -odds ratio

<sup>1</sup> Efficacy defined by odds ratio >1

<sup>2</sup> Number of participants with known outcome slightly less than number randomized. Missingness ≤ 2% in all cases



**eTable 8. Treatment Effects on Organ Support-Free Days and Hospital Survival Among Critically Ill Patients Enrolled in the Antiplatelet Domain and/or Therapeutic Anticoagulation Domain**

| <b>Organ Support Free Days at Day 21</b>                          |                     | <b>Reference</b>                                |
|-------------------------------------------------------------------|---------------------|-------------------------------------------------|
| Pooled Antiplatelet Therapy <sup>1</sup>                          | N=1020              | N=529                                           |
| Adjusted odds ratio, median (IQR)                                 | 1.02 (0.86 to 1.23) | No Antiplatelet                                 |
| Probability of efficacy <sup>2</sup> , %                          | 58                  | -                                               |
| Therapeutic Anticoagulation <sup>3</sup>                          | N=499               | N=511                                           |
| Adjusted odds ratio, median (IQR)                                 | 0.90 (0.72 to 1.14) | Usual Care Thromboprophylaxis                   |
| Probability of efficacy <sup>2</sup> , %                          | 19                  | -                                               |
| Antiplatelet/Anticoagulation Combination <sup>4</sup>             | N=35                | N=26                                            |
| Adjusted odds ratio, median (IQR)                                 | 0.73 (0.44 to 1.21) | No Antiplatelet / Usual Care Thromboprophylaxis |
| Probability of efficacy <sup>2</sup> , %                          | 12                  | -                                               |
| <b>Hospital Survival</b>                                          |                     | <b>Reference</b>                                |
| Antiplatelet Therapy <sup>1</sup>                                 | N=1020              | N=529                                           |
| Adjusted odds ratio, median (IQR)                                 | 1.27 (0.99 to 1.62) | No Antiplatelet                                 |
| Probability of efficacy <sup>2</sup> , %                          | 97                  | -                                               |
| Therapeutic Anticoagulation <sup>3</sup>                          | N=499               | N=511                                           |
| Adjusted odds ratio, median (IQR)                                 | 0.88 (0.66 to 1.16) | Usual Care Thromboprophylaxis                   |
| Probability of efficacy <sup>2</sup> , %                          | 19                  | -                                               |
| Antiplatelet/Therapeutic Anticoagulation Combination <sup>4</sup> | N=35                | N=26                                            |
| Adjusted odds ratio, median (IQR)                                 | 0.72 (0.41 to 1.28) | No Antiplatelet / Usual Care Thromboprophylaxis |
| Probability of efficacy <sup>2</sup> , %                          | 12                  | -                                               |

<sup>1</sup> Estimate for all critically ill patients randomized in the Antiplatelet Domain

<sup>2</sup> Efficacy defined by OR > 1.

Adjusted OR based on analysis of critically ill patients randomized in the Antiplatelet Domain, critically ill patients randomized in the Therapeutic Anticoagulation Domain and 122 patients who were co-enrolled in both Antiplatelet Domain and Therapeutic Anticoagulation Domain

<sup>3</sup> Estimate for all critically ill patients randomized in the Therapeutic Anticoagulation Domain

<sup>4</sup> Estimate includes 122 patients co-enrolled in the Antiplatelet Domain and the Therapeutic Anticoagulation Domain. 35 patients were randomized to antiplatelet treatment (either aspirin or P2Y12 inhibitor) and therapeutic-dose heparin. 26 patients were randomized to no antiplatelet and usual care thromboprophylaxis. 49 patients were randomized to antiplatelet treatment and usual care thromboprophylaxis. 12 patients were randomized to therapeutic-dose heparin and no antiplatelet.

**eTable 9. In-Hospital Survival and Organ Support by Differential Anticoagulant Dose Given (Randomized and Clinical Decision) in Critically Ill Patients**

|                                                   | <b>Pooled<br/>Antiplatelet</b> | <b>Aspirin</b> | <b>P2Y12<br/>Inhibitor</b> | <b>No Antiplatelet<br/>Therapy</b> |
|---------------------------------------------------|--------------------------------|----------------|----------------------------|------------------------------------|
| <b>Less than Therapeutic Dose Anticoagulation</b> |                                |                |                            |                                    |
| Number of Deaths (%)                              | 205/767 (26.7)                 | 124/444 (27.9) | 81/323 (25.1)              | 136/414 (32.9)                     |
| OSFD, Median (95% CrI)                            | 8 (−1, 16)                     | 8 (−1, 16)     | 9 (−0.5, 16)               | 7.5 (−1, 16)                       |
| OSFD in survivors, Median (95% CrI)               | 14 (4, 17)                     | 14 (4, 17)     | 14 (4, 17.75)              | 15 (7, 18)                         |
| Adjusted OR for Survival (Median, 95% CrI)        | 1.33 (0.99, 1.79)              | -              | -                          | Reference (1)                      |
| Probability of efficacy <sup>1</sup> (%)          | 97.1                           | -              | -                          | -                                  |
| Patients with major bleeding events (%)           | 17/761 (2.2)                   | 10/441 (2.3)   | 7/320 (2.2)                | 1/410 (0.2)                        |
| <b>Therapeutic Dose Anticoagulation</b>           |                                |                |                            |                                    |
| Number of Deaths (%)                              | 46/124 (37.1)                  | 20/60 (33.3)   | 26/64 (40.6)               | 13/55 (23.6)                       |
| OSFD, Median (95% CrI)                            | 0 (−1, 14)                     | 4 (−1, 13)     | 0 (−1, 15)                 | 7 (0, 15.5)                        |
| OSFD in survivors, Median (95% CrI)               | 12.5 (4.25, 17)                | 12 (4.5, 16)   | 14 (4.5, 17.75)            | 14 (6.25, 17)                      |
| Adjusted OR for Survival (Median, 95% CrI)        | 0.63 (0.31, 1.28)              | -              | -                          | Reference (1)                      |
| Probability of efficacy <sup>1</sup> (%)          | 10.1                           | -              | -                          | -                                  |
| Patients with major bleeding events (%)           | 3/123 (2.4)                    | 0/60 (0.0)     | 3/63 (4.8)                 | 1/55 (1.8)                         |
| <b>Unknown Dose Anticoagulation</b>               |                                |                |                            |                                    |
| Number of Deaths (%)                              | 37/120 (30.8)                  | 17/59 (28.8)   | 20/61 (32.8)               | 18/52 (34.6)                       |
| OSFD, Median (95% CrI)                            | 6.5 (−1, 17)                   | 9 (−1, 17)     | 6 (−1, 16)                 | 0 (−1, 13.75)                      |
| OSFD in survivors, Median (95% CrI)               | 14 (6, 17)                     | 15.5 (6, 18)   | 13 (6, 17)                 | 11.5 (0.75, 17.75)                 |
| Adjusted OR for Survival (Median, 95% CrI)        | 1.09 (0.53, 2.17)              | -              | -                          | Reference (1)                      |
| Probability of efficacy <sup>1</sup> (%)          | 59.6                           | -              | -                          | -                                  |
| Patients with major bleeding events (%)           | 1/118 (0.8)                    | 1/58 (1.7)     | 0/60 (0.0)                 | 0/52 (0)                           |

OR - Odds Ratio, OSFD – Organ Support Free Days

<sup>1</sup> Efficacy defined by OR >1

### eFigure 1. Patient Enrollment by Intervention and Time-Period

Number of patients randomized (y axis) to an antiplatelet intervention (color) during two-week time periods (x axis).

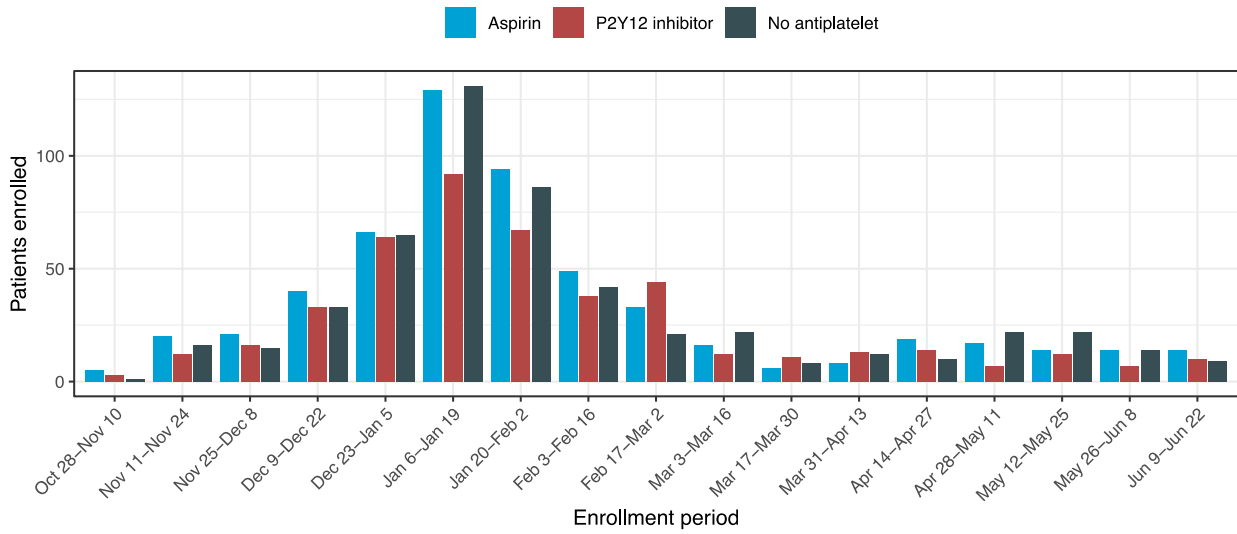

**eFigure 2. Distributions of OSFD Odds Ratio for Pooled Antiplatelet**

Summary of Bayesian probability distributions for the pooled antiplatelet odds ratio effect on organ support-free days (upper panel) and in-hospital mortality (lower panel) in the Unblinded ITT analysis model. The panels present density estimates of the probability density function for the prior and posterior distribution of the pooled antiplatelet odds ratio. The estimated density (y axis) is shown for a range of odds ratio values (x axis). The x-axis is log-transformed so that equivalent-size relative effects are equidistant from 1 (*i.e.*, 0.5 and 2 are the same distance from 1). The gray dashed line represents the density of the prior distribution (a standard normal prior on the log odds ratio). With the log-transformed x-axis, the prior is centered on 1 (no effect of antiplatelet therapy) and symmetric and nearly all of the prior mass (98%) falls between odds ratios of 0.1 to 10. The yellow solid line represents the density of the posterior distribution estimated using samples produced by Markov Chain Monte Carlo (MCMC) methods. In the upper panel, the mode of the posterior distribution is close to 1 and, compared to the prior distribution, the distribution has substantially shrunk towards an odds ratio of 1 with 95% of the posterior mass falling between 0.86 and 1.25. In the lower panel, the mode of the posterior distribution is above 1 and 95% of the posterior mass falls between 0.97 and 1.62.

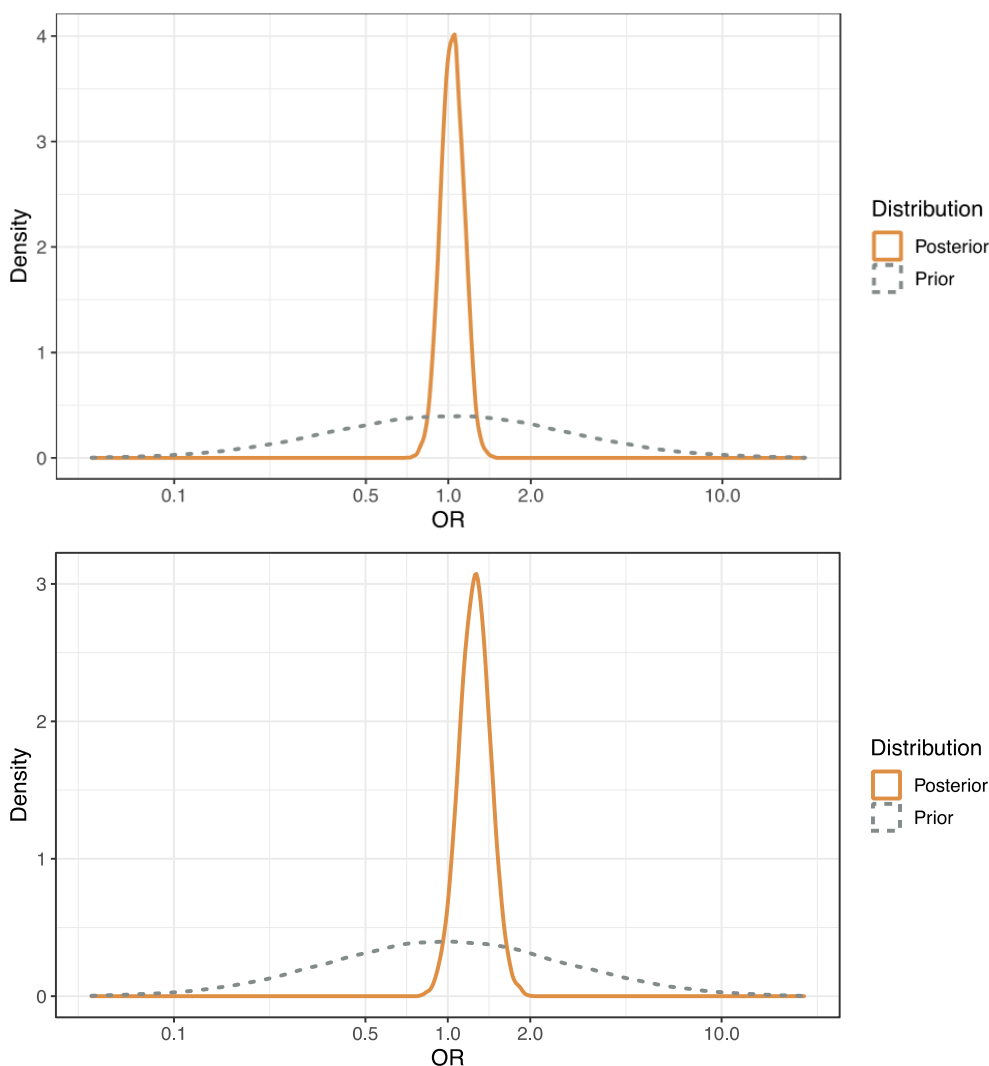

**eFigure 3. Interaction Between Antiplatelet Allocation and Anticoagulation Dose for OSFD**

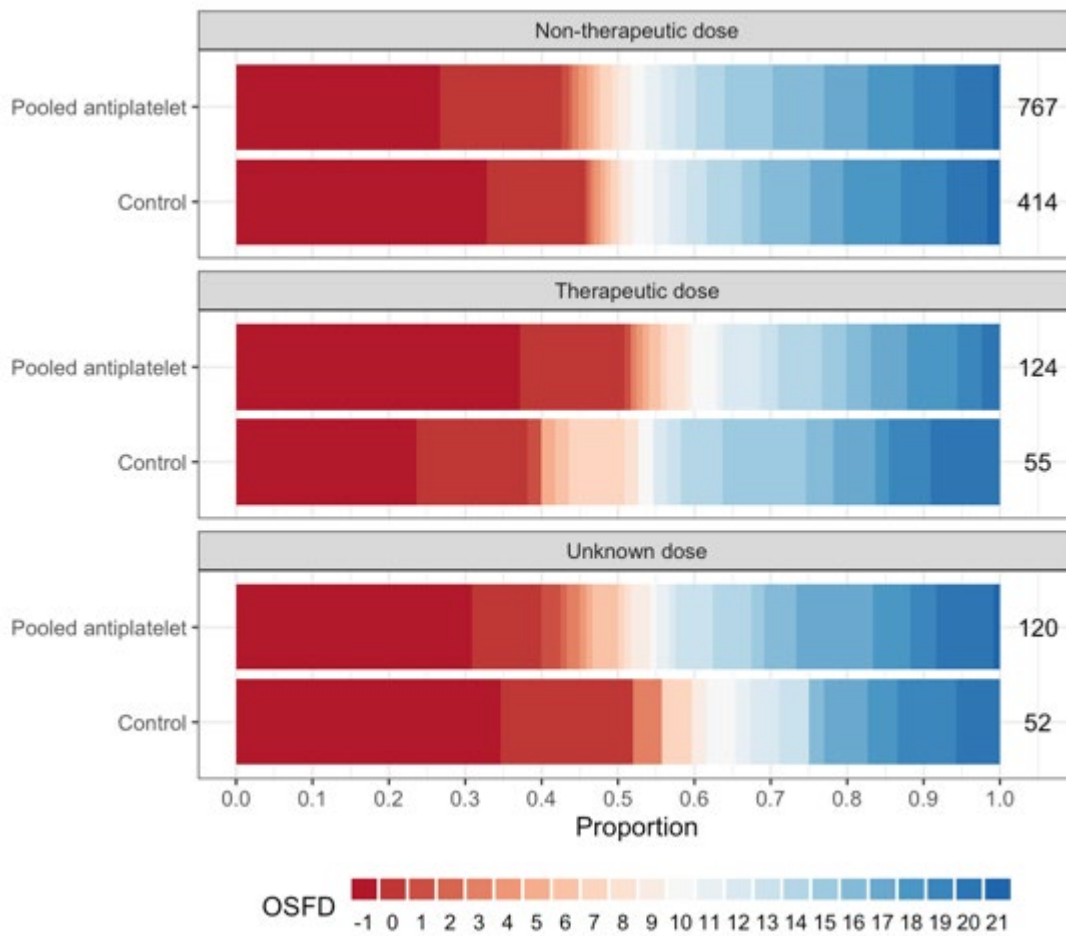

## eReferences

1. Angus DC, Berry S, Lewis RJ, et al. The REMAP-CAP (Randomized Embedded Multifactorial Adaptive Platform for Community-acquired Pneumonia) Study. Rationale and Design. *Ann Am Thorac Soc* 2020;17:879-91.
2. Angus DC. Fusing Randomized Trials With Big Data: The Key to Self-learning Health Care Systems? *JAMA* 2015;314:767-8.
3. Characterisation WHO GotC, Covid-infection Mo. A minimal common outcome measure set for COVID-19 clinical research. *Lancet Infect Dis* 2020;20:e192-e7.
4. Schulman S, Kearon C, Subcommittee on Control of Anticoagulation of the S, Standardization Committee of the International Society on T, Haemostasis. Definition of major bleeding in clinical investigations of antihemostatic medicinal products in non-surgical patients. *J Thromb Haemost* 2005;3:692-4.
